# Supplementary material for: Monosubstituted dually cationic cyclodextrins for stronger chiral recognition
Source: Royal Society of Chemistry journal article supplement (doi:10.1039/c2ra20086d), 2012-01-01

## Electronic Supplementary Information

### Monosubstituted dually cationic cyclodextrins for stronger chiral recognition

Yun Dai, Jie Zhou, Shuye Wang, Enwei Zhu, Jiefeng Hai, Yun Liu, Jian Tang\*, Weihua Tang\*

|                                                                                                                                                                           |     |
|---------------------------------------------------------------------------------------------------------------------------------------------------------------------------|-----|
| 1. Instrumentation.....                                                                                                                                                   | S2  |
| 2. Synthesis of compound <b>3</b> , <b>4</b> , <b>8a</b> and <b>9a</b> .....                                                                                              | S2  |
| 3. <sup>1</sup> H and <sup>13</sup> C NMR spectra of <b>5a</b> .....                                                                                                      | S5  |
| 4. <sup>1</sup> H and <sup>13</sup> C NMR spectra of <b>5b</b> .....                                                                                                      | S6  |
| 5. <sup>1</sup> H and <sup>13</sup> C NMR spectra of <b>5c</b> .....                                                                                                      | S7  |
| 6. <sup>1</sup> H and <sup>13</sup> C NMR spectra of <b>5d</b> .....                                                                                                      | S8  |
| 7. <sup>1</sup> H and <sup>13</sup> C NMR spectra of <b>6a</b> .....                                                                                                      | S9  |
| 8. <sup>1</sup> H and <sup>13</sup> C NMR spectra of <b>6b</b> .....                                                                                                      | S10 |
| 9. <sup>1</sup> H and <sup>13</sup> C NMR spectra of <b>6c</b> .....                                                                                                      | S11 |
| 10. <sup>1</sup> H and <sup>13</sup> C NMR spectra of <b>6d</b> .....                                                                                                     | S12 |
| 11. <sup>1</sup> H and <sup>13</sup> C NMR spectra of <b>7a</b> .....                                                                                                     | S13 |
| 12. <sup>1</sup> H and <sup>13</sup> C NMR spectra of <b>7b</b> .....                                                                                                     | S14 |
| 13. <sup>1</sup> H and <sup>13</sup> C NMR spectra of <b>7c</b> .....                                                                                                     | S15 |
| 14. <sup>1</sup> H and <sup>13</sup> C NMR spectra of <b>7d</b> .....                                                                                                     | S16 |
| 15. ESI-MS spectra of <b>5a</b> , <b>5b</b> , <b>5c</b> , <b>5d</b> , <b>6a</b> , <b>6b</b> , <b>6c</b> , <b>6d</b> , <b>7a</b> , <b>7b</b> , <b>7c</b> , <b>7d</b> ..... | S17 |

## 1. Instrumentation

All  $^1\text{H}$ NMR spectra and mono-dimensional  $^1\text{H}$ NMR spectra (TOCSY) were recorded on a Bruker AVANCE 500 MHz (Bio-Spin Corporation, Europe) spectrometer in  $\text{DMSO-d}_6$ . Data is expressed in parts per million (ppm) downfield shift from tetramethylsilane as internal reference and are reported as position (in ppm), multiplicity (s = singlet, d = doublet, t = triplet, m = multiplet), coupling constant ( $J$  in Hz) and integration (number of protons).  $^{13}\text{C}$ NMR spectra were recorded on a Bruker AVANCE 500 MHz spectrometer in  $\text{CDCl}_3$  or  $\text{DMSO-d}_6$  or  $\text{D}_2\text{O}$  with complete proton decoupling. Data is expressed in parts per million (ppm) shift relative to  $\text{DMSO-d}_6$  (39.51 ppm) is reported as position ( $\delta$ ). Melting points were recorded on Beijing TECH brand melting point apparatus and are uncorrected. Electrospray Ionization spectra were acquired on a Finniga/AM TSQ Qurantum (Thermal, USA) time of flight mass spectrometer. Samples are presented in Methanol (or your solvent here) as a 100  $\mu\text{l}$  loop injection by manual operation. Elemental analysis was carried out on a Perkin-Elmer 2400 CHN analyzer.

Beckman P/ACE MDQ CE unit (Fullerton, CA, USA) was used for all CE separations. 50  $\mu\text{m}$  ID, 375  $\mu\text{m}$  OD fused silica capillary was used with a total length of 59.2 cm (49 cm to the detector). Detection of analytes was carried out simultaneously at 214 nm, 254 nm and 280nm by using variable-wavelength PDA (Photodiode Array, 190-300 nm) detector. The electrosmotic flow (EOF) was measured with methanol as neutral marker. Samples were introduced hydrodynamically into the capillary at 0.5 psi for 5 s. All experiments were performed under normal polarity with 15 kV applied voltage.

## 2. Synthesis of compound 3, 4, 8a and 9a.

*N*-(2-Bromoethyl)phthalimide (**3a**). Towards a solution of 1,2-dibromoethane (7.66 mL, 64.8 mmol) in acetone (20 mL) was added with **2** (4 g, 21.6 mmol) under  $\text{N}_2$ . The reaction mixture was stirred at 60°C for 12 h under reflux. After cooling down to room temperature, KBr precipitate was removed via filtration. The filtrate was concentrated to ~10 mL. Recrystallization from ethanol afforded the title

compound **3a** (4.61 g, 84%) as a white solid:  $^1\text{H}$  NMR (500 MHz,  $\text{CDCl}_3$ ):  $\delta$ = 7.89 (m, 2H, =CH<sub>ortho</sub>), 7.77 (m, 2H, =CH<sub>meta</sub>), 4.12 (t, 2H,  $J$  = 6.6 Hz, -CH<sub>2-N-imine</sub>), 3.63 (t, 2H,  $J$  = 6.6 Hz, -CH<sub>2-bromo</sub>).

*N*-(3-bromopropyl)phthalimide (**3b**). White solid (yield 89%):  $^1\text{H}$  NMR (500 MHz,  $\text{CDCl}_3$ ):  $\delta$ = 7.88 (m, 2H, =CH<sub>ortho</sub>), 7.77 (m, 2H, =CH<sub>meta</sub>), 3.85 (t, 2H,  $J$  = 6.6 Hz, -CH<sub>2-imine</sub>), 3.43 (t, 2H,  $J$  = 6.6 Hz, -CH<sub>2-bromo</sub>), 2.27 (m, 2H,  $J$  = 6.9 Hz,  $J$  = 6.6 Hz, -CH<sub>2</sub>).

*N*-(4-bromobutyl)phthalimide (**3c**). White solid (yield 83%):  $^1\text{H}$  NMR (500 MHz,  $\text{CDCl}_3$ ):  $\delta$ = 7.86 (m, 2H, =CH<sub>ortho</sub>), 7.73 (m, 2H, =CH<sub>meta</sub>), 3.73 (t, 2H,  $J$  = 6.6 Hz, -CH<sub>2-imine</sub>), 3.45 (t, 2H,  $J$  = 6.6 Hz, -CH<sub>2-bromo</sub>), 1.89 (m, 4H, -CH<sub>2</sub>).

*N*-(6-bromohexyl)phthalimide (**3d**). White solid (yield 91%):  $^1\text{H}$  NMR (500 MHz,  $\text{CDCl}_3$ ):  $\delta$ = 7.85 (m, 2H, =CH<sub>ortho</sub>), 7.73 (m, 2H, =CH<sub>meta</sub>), 3.69 (t, 2H,  $J$  = 6.6 Hz, -CH<sub>2-imine</sub>), 3.40 (t, 2H,  $J$  = 6.6 Hz, -CH<sub>2-bromo</sub>), 1.86 (m, 2H, -CH<sub>2</sub>), 1.67 (m, 2H, -CH<sub>2</sub>), 1.44 (m, 2H, -CH<sub>2</sub>), 1.34 (m, 2H, -CH<sub>2</sub>).

*N*-[2-(1*H*-Imidazolyl)ethyl]phthalimide (**4a**).<sup>13</sup> To a suspension of sodium hydride (1.21 g, 50.46 mmol, 1.24 g of 97% mineral oil dispersion) in petroleum ether (20 mL) was bubbled with N<sub>2</sub> to remove the mineral oil. Freshly distilled DMF (25 mL) was added with stirring to dissolve the cleaned sodium hydride at 0°C over 35 min. To the above solution was gradually added with a solution of imidazole (2.63 g) in DMF (40 mL) over 1 h. A solution of **3a** (12 g, 42.53 mmol) in DMF (160 mL) was then added dropwise. The reaction mixture was refluxed at 100°C for 8 h. After removal of DMF, the syrupy residue was dissolved in dichloromethane, and washed with water at least three times. A further flush chromatography over silica gel with methanol/ethyl acetate (1/1, v/v) afforded the title compound **4a** (4.72 g, 46 %) as a white solid: m.p. 156°C;  $^1\text{H}$  NMR (500 MHz,  $\text{CDCl}_3$ ):  $\delta$ = 7.86 (m, 2H, =CH<sub>ortho</sub>), 7.76 (m, 2H, =CH<sub>meta</sub>), 7.46 (s, 1H, =CH<sub>2im</sub>), 7.07 (s, 1H, =CH<sub>4im</sub>), 7.00 (s, 1H, =CH<sub>5im</sub>), 4.33 (t, 2H,  $J$  = 6.6 Hz, -CH<sub>2-N-im</sub>), 4.08 (t, 2H,  $J$  = 6.6 Hz, -CH<sub>2-N-imine</sub>).

*N*-[3-(1*H*-imidazolyl)propyl]phthalimide (**4b**). White solid (yield 37%): m.p. 104°C;  $^1\text{H}$  NMR (500 MHz,  $\text{CDCl}_3$ ):  $\delta$ = 7.85 (m, 2H, =CH<sub>ortho</sub>), 7.75 (m, 2H, =CH<sub>meta</sub>), 7.57 (s, 1H, =CH<sub>2im</sub>), 7.04 (s, 1H, =CH<sub>4im</sub>), 6.99 (s, 1H, =CH<sub>5im</sub>), 4.01 (t, 2H,  $J$  = 6.9 Hz,

-CH<sub>2-N-im</sub>), 3.73 (t, 2H, *J* = 6.9 Hz, -CH<sub>2-N-imine</sub>), 2.18 (m, 2H, -CH<sub>2</sub>).

*N*-[4-(1*H*-imidazolyl)butyl]phthalimide (**4c**). White solid (yield 43%): m.p. 84°C; <sup>1</sup>H NMR (500 MHz, CDCl<sub>3</sub>): δ = 7.83 (m, 2H, =CH<sub>ortho</sub>), 7.72 (m, 2H, =CH<sub>meta</sub>), 7.48 (s, 1H, =CH-<sub>2im</sub>), 7.03 (s, 1H, =CH-<sub>4im</sub>), 6.91 (s, 1H, =CH-<sub>5im</sub>), 3.99 (t, 2H, *J* = 6.9 Hz, -CH<sub>2-N-im</sub>), 3.71 (t, 2H, *J* = 6.9 Hz, -CH<sub>2-N-imine</sub>), 1.84 (m, 2H, -CH<sub>2</sub>), 1.68 (m, 2H, -CH<sub>2</sub>).

*N*-[6-(1*H*-imidazolyl)hexyl]phthalimide (**4d**). White solid (yield 37%): m.p. 57°C; <sup>1</sup>H NMR (500 MHz, CDCl<sub>3</sub>): δ = 7.83 (m, 2H, =CH<sub>ortho</sub>), 7.73 (m, 2H, =CH<sub>meta</sub>), 7.45 (s, 1H, =CH-<sub>2im</sub>), 7.03 (s, 1H, =CH-<sub>4im</sub>), 6.89 (s, 1H, =CH-<sub>5im</sub>), 3.92 (t, 2H, *J* = 4.2 Hz, -CH<sub>2-N-im</sub>), 3.67 (t, 2H, *J* = 4.2 Hz, -CH<sub>2-imine</sub>), 1.78 (m, 2H, -CH<sub>2</sub>), 1.68 (m, 2H, -CH<sub>2</sub>), 1.37 (m, 2H, -CH<sub>2</sub>).

(1*H*-imidazol-1-yl)ethylamine (**8a**). A mixture solution of **4a** (0.17 g, 0.7 mmol), ethanol (10 mL), and hydrazine hydrate (0.039g, 0.77 mmol) was stirred at 80°C for 12 h. After cooling down to room temperature, hydrochloric acid (7.7 mmol) was added before refluxing the solution for another 5 h. Removal of the insoluble solid by filtration, the filtrate was concentrated and added with sodium hydroxide (7.7 mmol, 1 M) solution. Extracted with dichloromethane (3×15 mL), the collected solution was dried with MgSO<sub>4</sub> and evaporated to afford title compound as a colorless oil: <sup>1</sup>H NMR (500 MHz, DMSO-*d*<sub>6</sub>) δ 7.59 (s, 1H, =CH-<sub>2im</sub>), 7.14 (s, 1H, =CH-<sub>4im</sub>), 6.86 (s, 1H, =CH-<sub>5im</sub>), 3.93 (t, 2H, -CH<sub>2-N-im</sub>), 2.51 (t, 2H, *J* = 6.9 Hz, -CH<sub>2-N-amine</sub>).

Mono-6<sup>A</sup>-[2-(3-imidazoethyl)-ammonium]-6<sup>A</sup>-deoxy-β-cyclodextrin chloride (**10a**). Similar synthetic approach as for **5** and **7** afforded the title compound as a white solid (82%): <sup>1</sup>H NMR (300 MHz, DMSO-*d*<sub>6</sub>) δ 8.67 (s, 1H, =CH-<sub>2im</sub>), 8.28-8.24 (br, 2H, -NH<sub>2</sub>), 7.60 (s, 1H, =CH-<sub>4im</sub>), 7.10 (s, 1H, =CH-<sub>5im</sub>), 8.02 (s, 2H), 7.94 (s, 2H), 5.80-5.70 (m, 14H, OH-2 and OH-3), 4.96 (s, 1H, H-1), 4.83 (s, 6H, H-1), 4.51 (s br, 6H, OH-6), 4.14 (t, 2H, *J* = 6.6 Hz, -CH<sub>2</sub>); 4.03 (br, 1H, H-3'<sub>CD</sub>), 3.64-3.36 (m, 27H, H-5<sub>CD</sub>, H-3<sub>CD</sub> and H-6<sub>CD</sub>), 3.36-3.26 (m, 14H, H-2<sub>CD</sub> and H-4<sub>CD</sub>), 3.05 (t, 2H, *J* = 4.8 Hz, -CH<sub>2</sub>NH<sub>2</sub>), 1.92 (t, 2H, *J* = 6.6 Hz, *J* = 4.8 Hz, -CH<sub>2</sub>). 1399.4586; ESI-MS (*m/z*): calculated for [M<sup>+</sup>] 1229.12, found 1228.86; Anal. Calcd for C<sub>48</sub>H<sub>80</sub>ClO<sub>34</sub>N<sub>3</sub>: C 45.09, H 6.31, N 3.29; found: C 45.89, H 6.32, N 3.26.

3.  $^1\text{H}$  and  $^{13}\text{C}$  NMR spectra of Mono-6<sup>A</sup>-[3-(3-(1,3-dioxisoindolin-2-yl)ethyl)-imidazol-1-ium]-6<sup>A</sup>-deoxy- $\beta$ -cyclodextrin tosylate **5a**

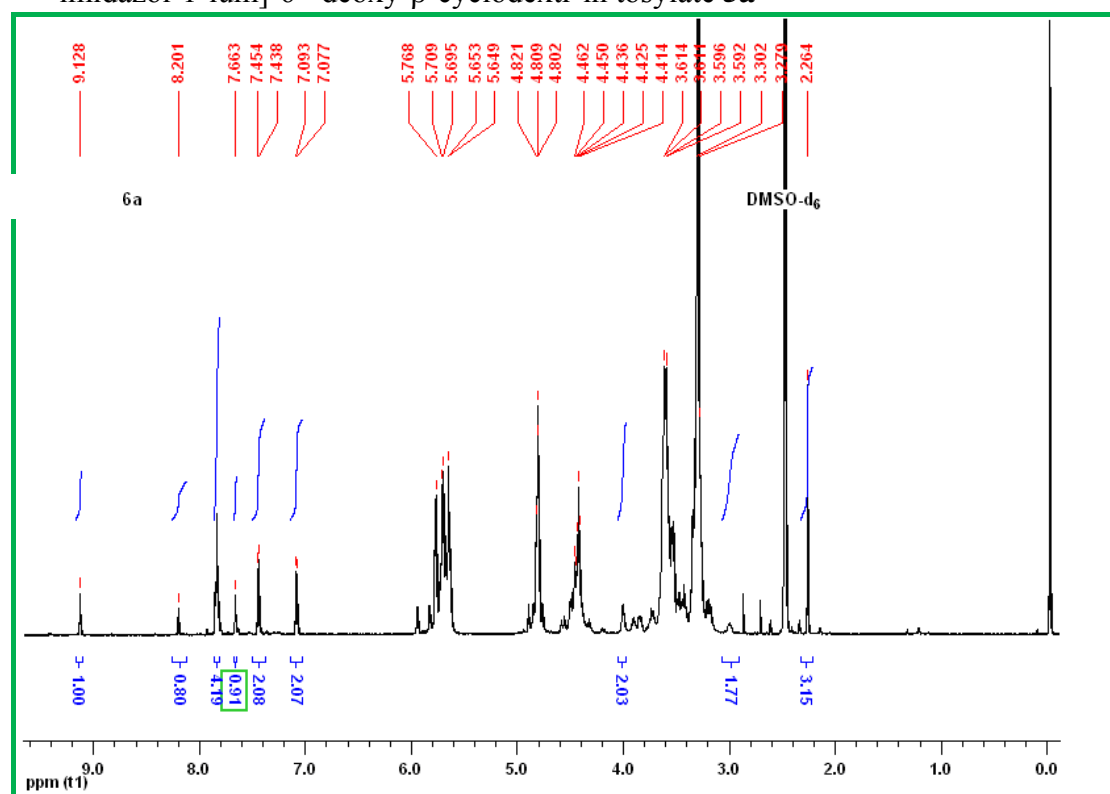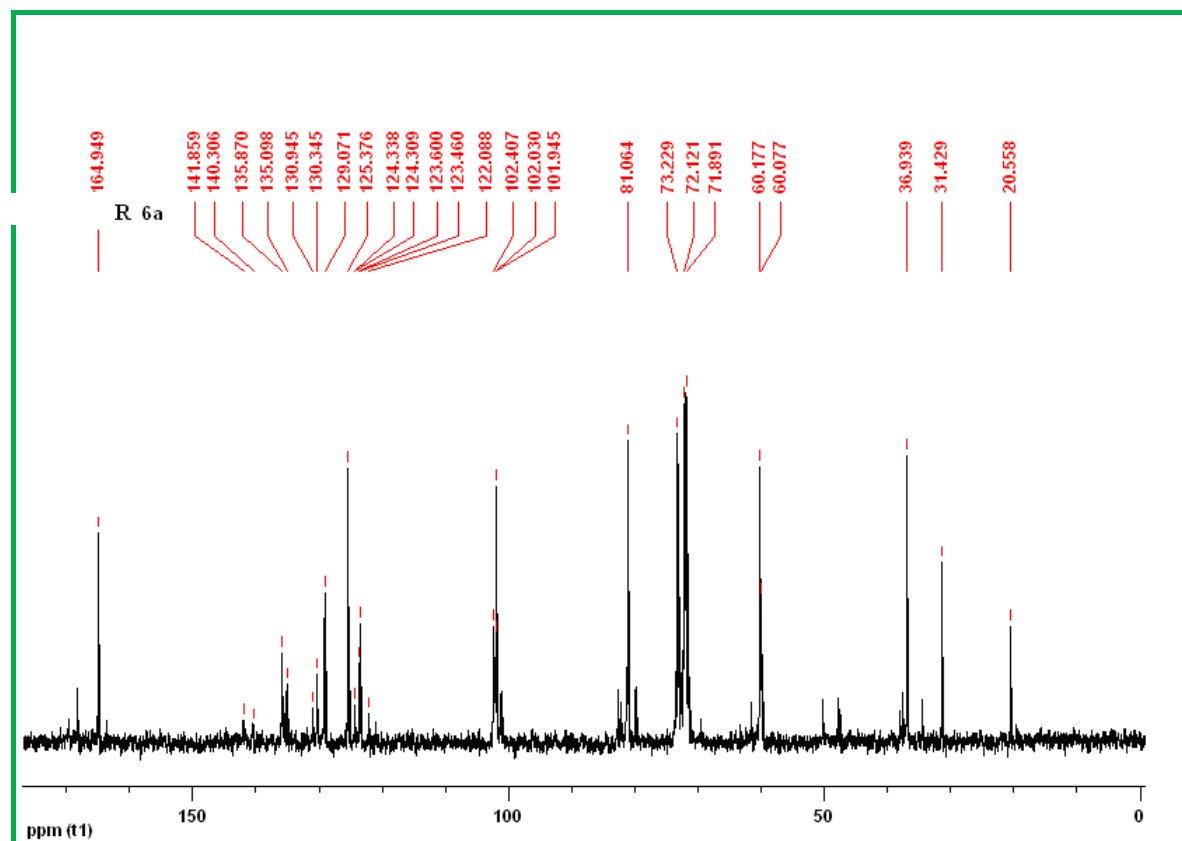

4. Mono-6<sup>A</sup>-[3-(3-(1,3-dioxoisindolin-2-yl)propyl)-imidazol-1-ium]-6<sup>A</sup>-deoxy-β-cyclodextrin tosylate **5b**

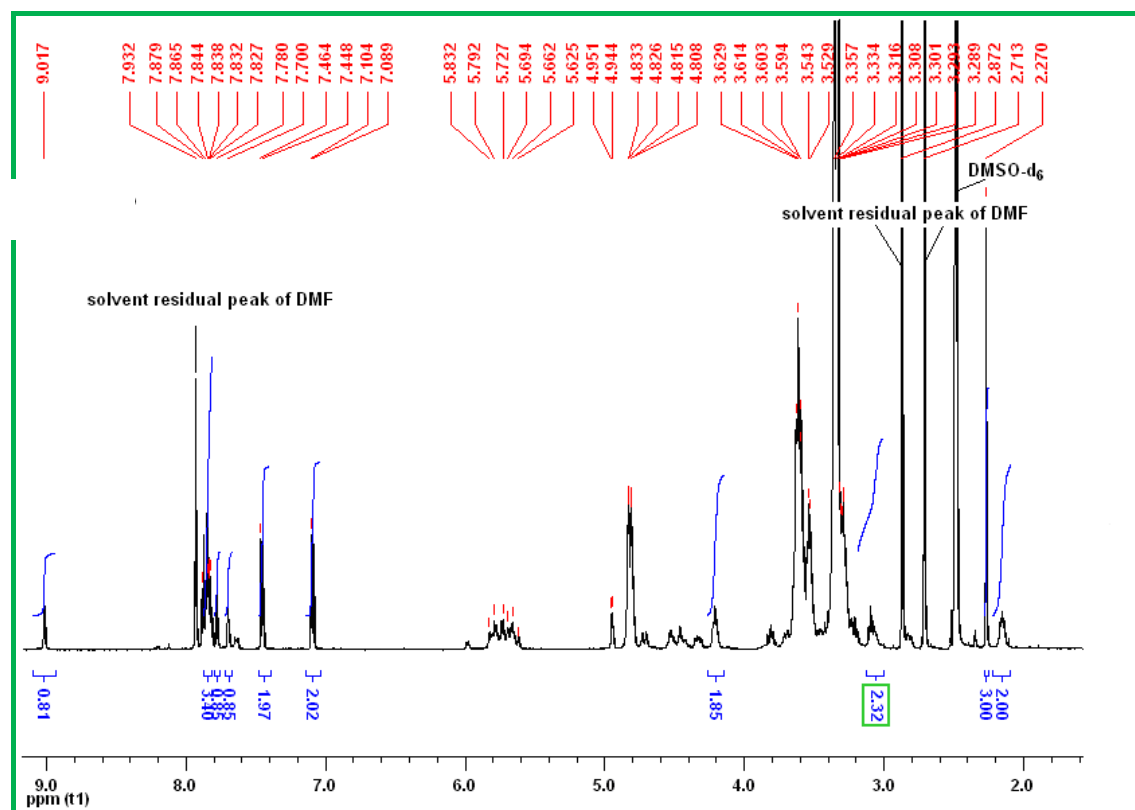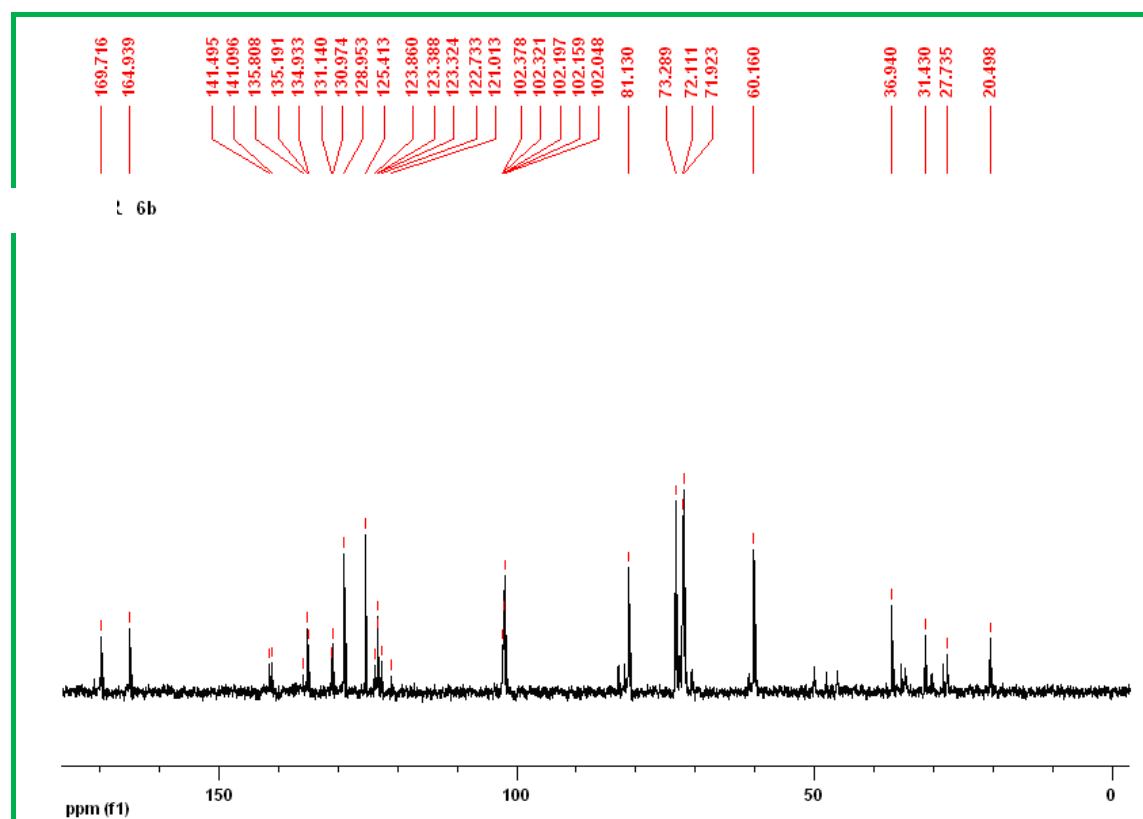

5. Mono-6<sup>A</sup>-[3-(4-(1,3-dioxoisindolin-2-yl)butyl)-imidazol-1-ium]-6<sup>A</sup>-deoxy-β-cyclodextrin tosylate **5c**

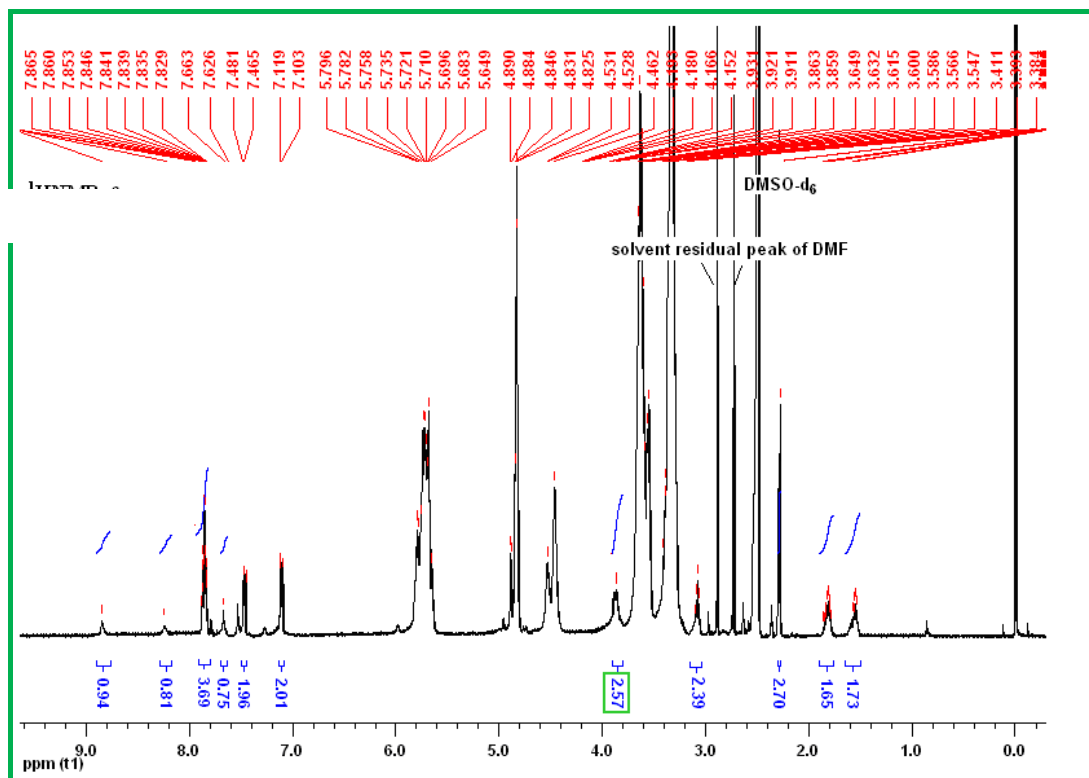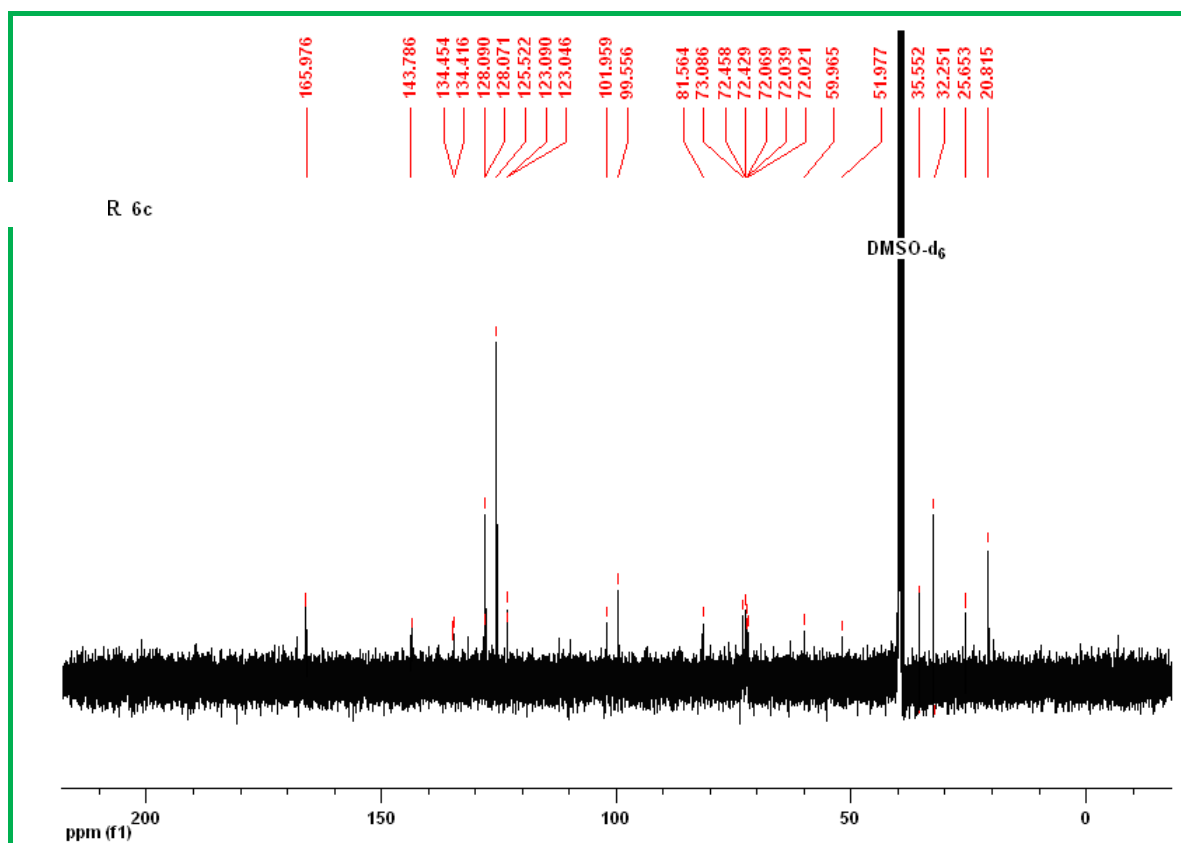

6. Mono-6<sup>A</sup>-[3-(6-(1,3-dioxoisindolin-2-yl)hexyl)-imidazol-1-ium]-6<sup>A</sup>-deoxy-β-cyclodextrin tosylate **5d**

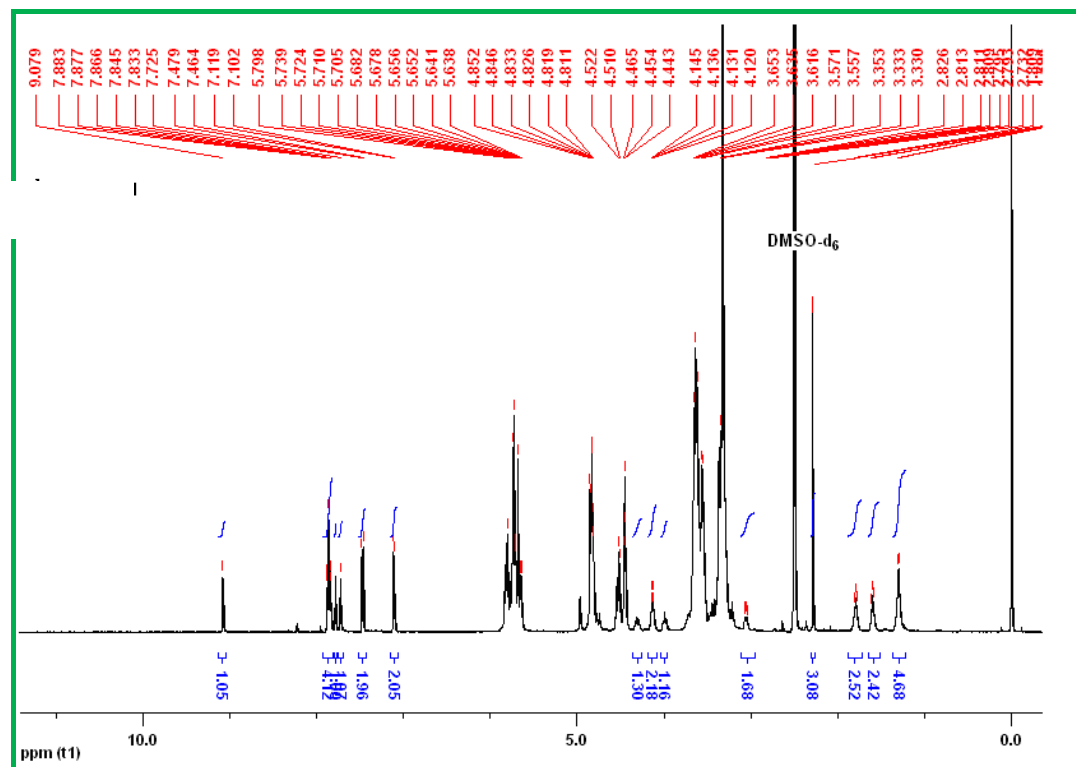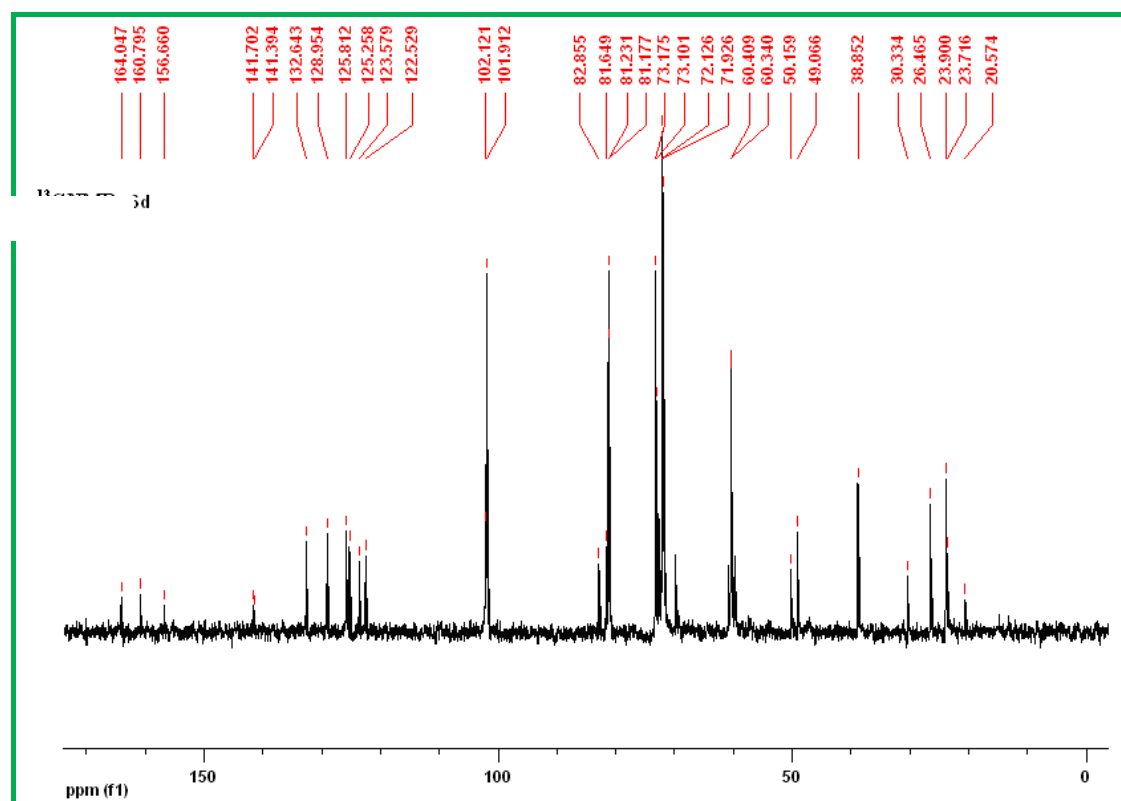



7. Mono-6<sup>A</sup>-[3-(2-aminoethyl)-imidazol-1-ium]-6<sup>A</sup>-deoxy-β-cyclodextrin tosylate,

6a

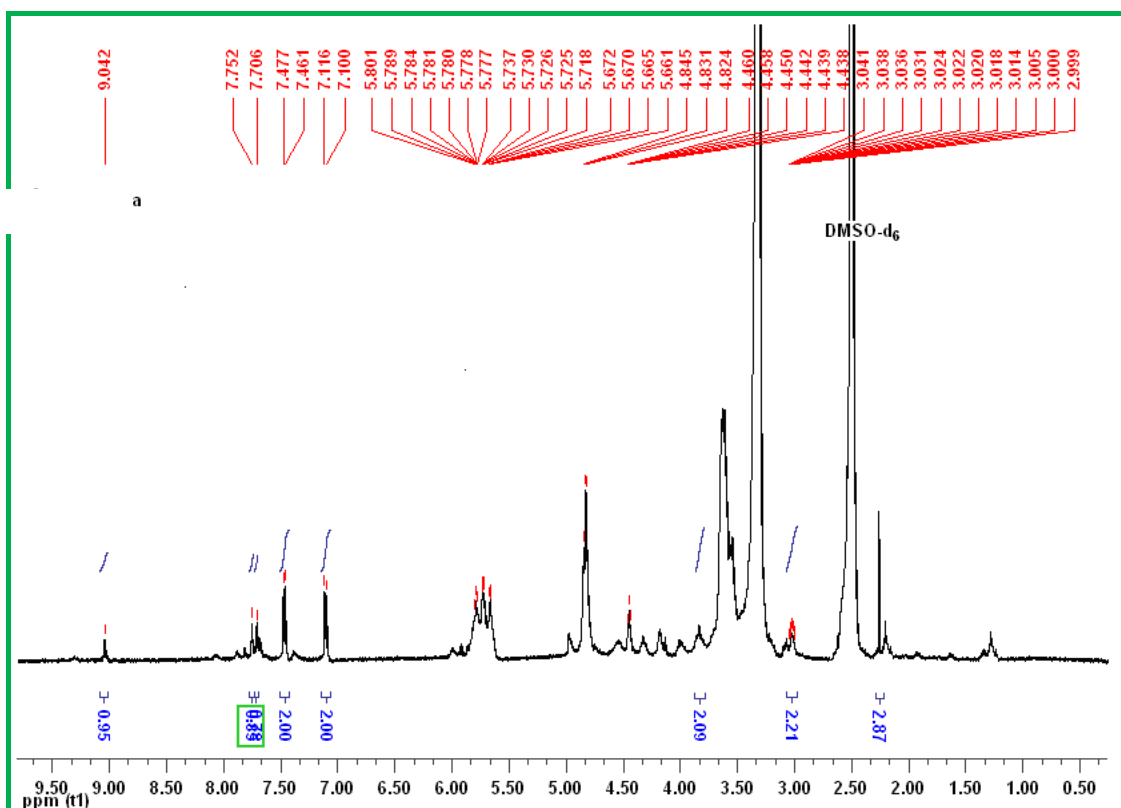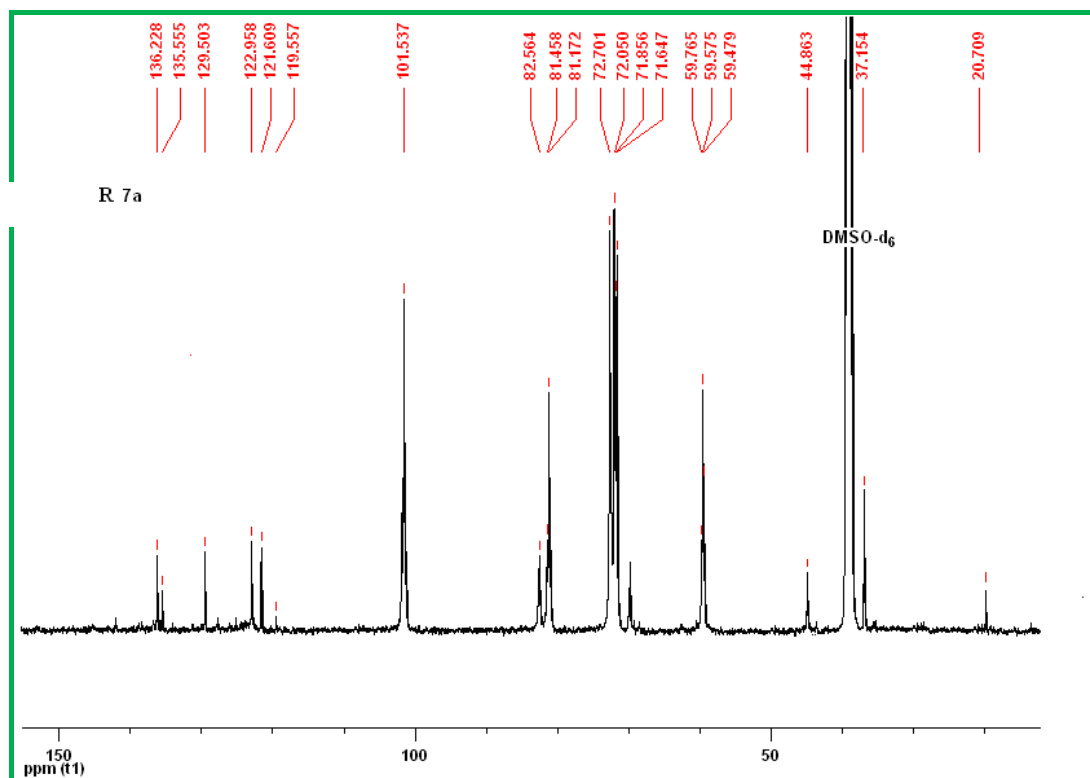

### 8. Mono-6<sup>A</sup>-[3-(3-aminopropyl)-imidazolium]-6<sup>A</sup>-deoxy-β-cyclodextrin tosylate, **6b**

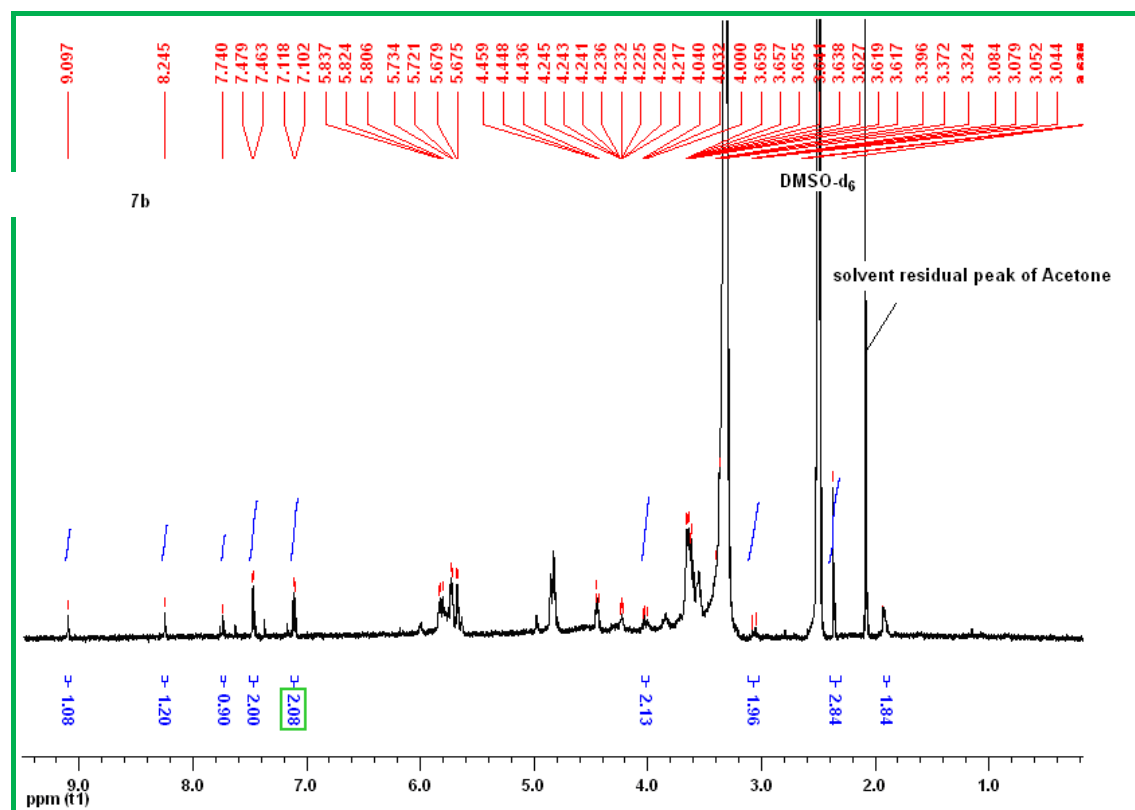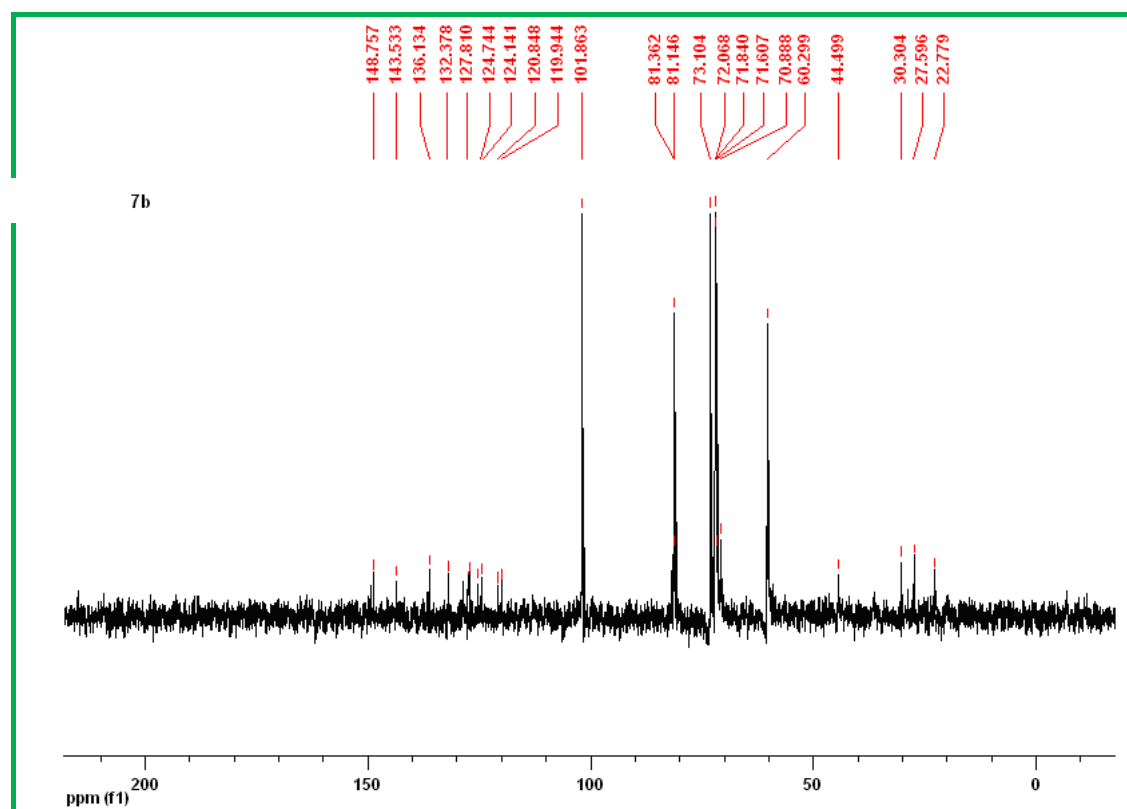

9. Mono-6<sup>A</sup>-[3-(4-aminobutyl)-imidazol-1-ium]-6<sup>A</sup>-deoxy-β-cyclodextrin tosylate,

6c

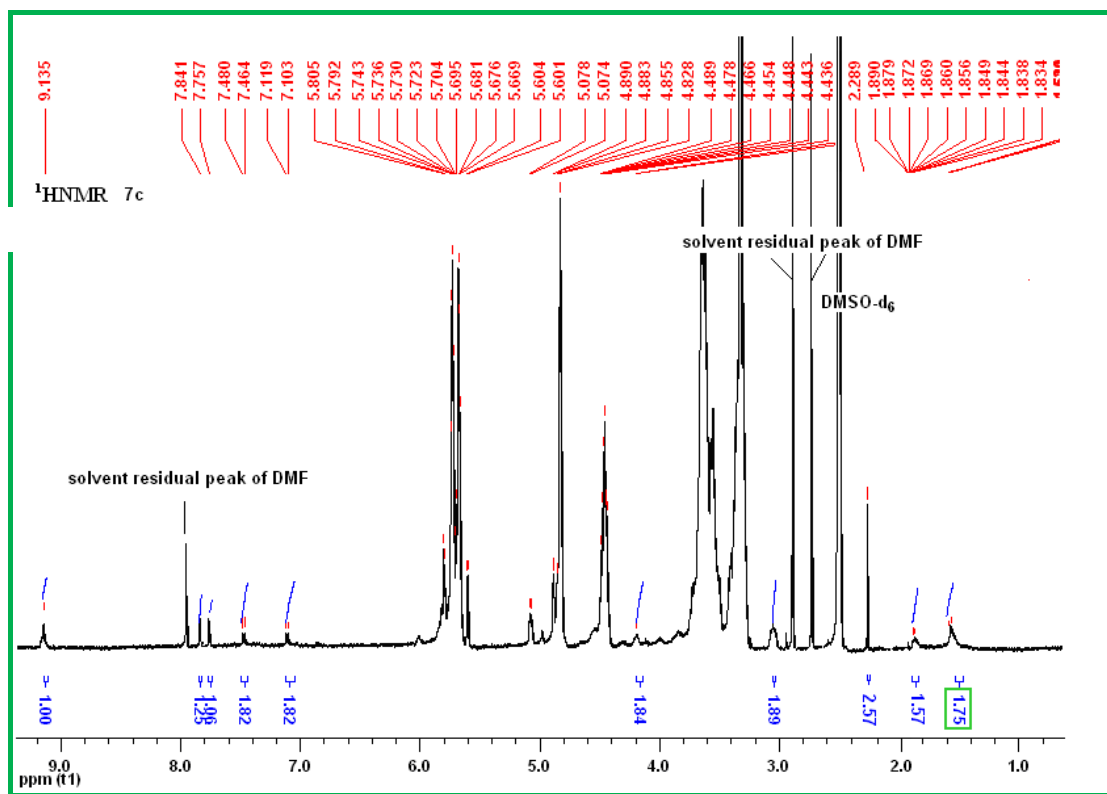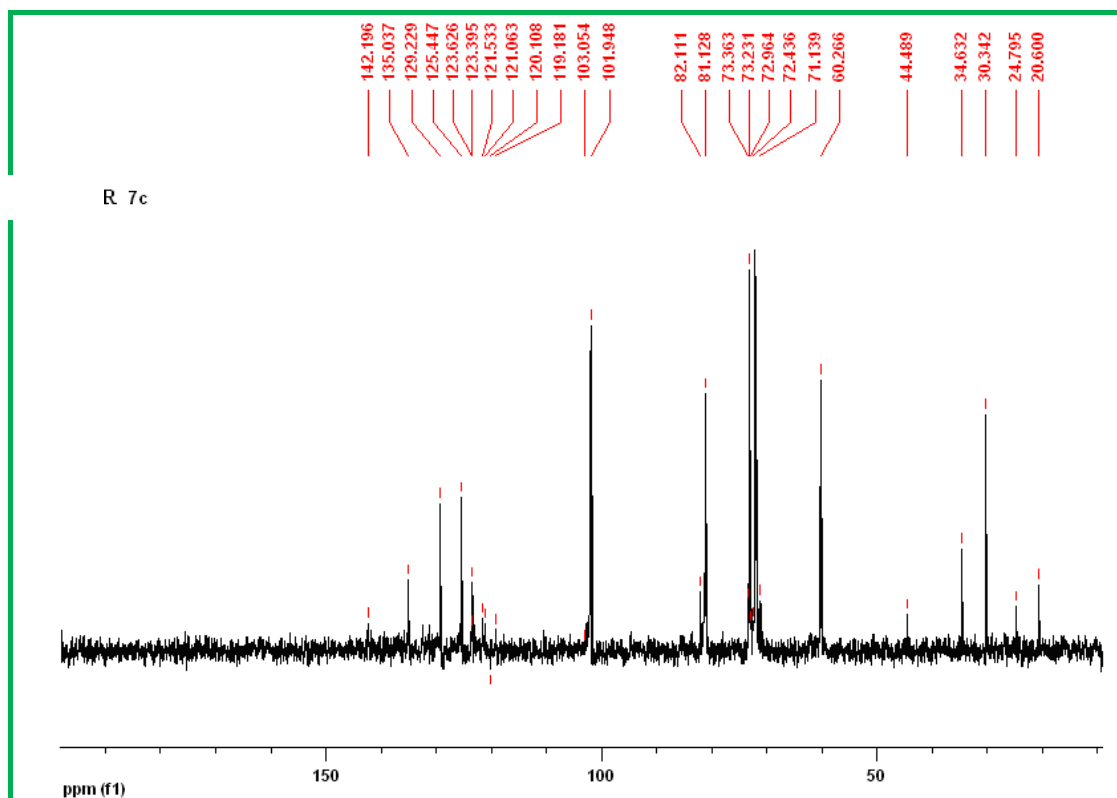

10. Mono-6<sup>A</sup>-[3-(6-aminohexyl)-imidazol-1-ium]-6<sup>A</sup>-deoxy-β-cyclodextrin tosylate, **6d**

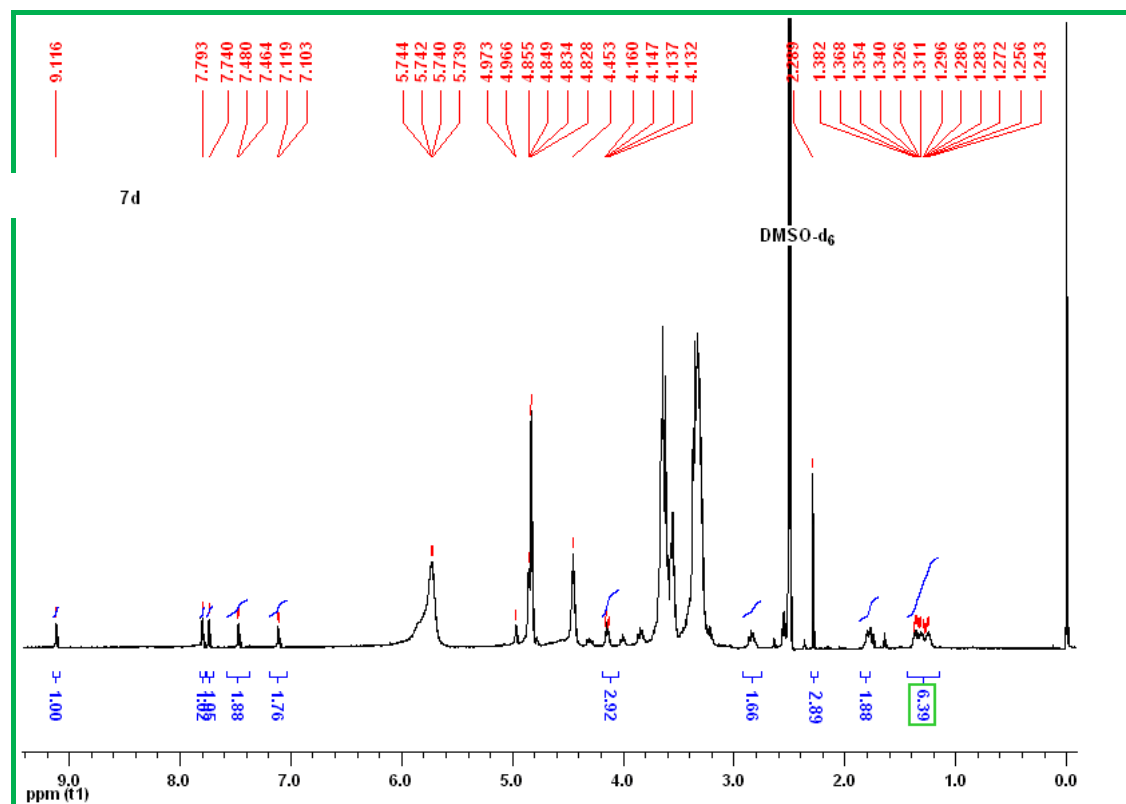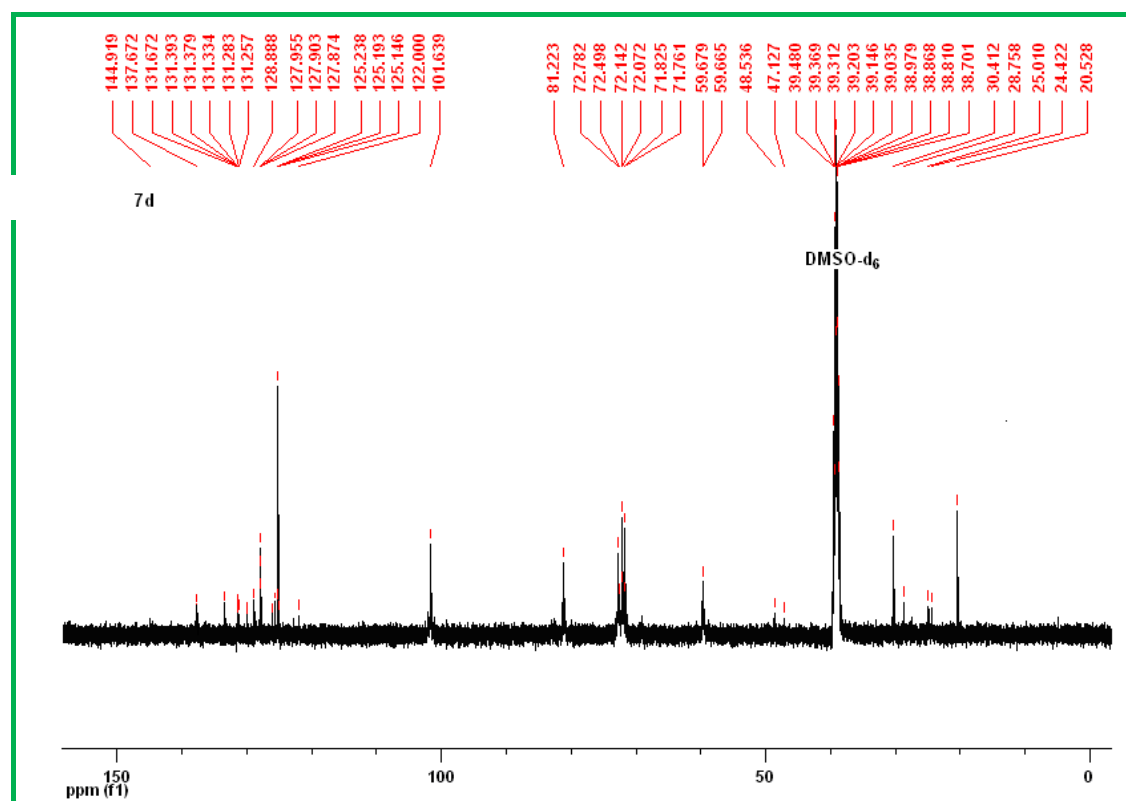

11. Mono-6<sup>A</sup>-[3-(2-ammonioethyl)-imidazol-1-ium]-6<sup>A</sup>-deoxy-β-cyclodextrin chloride, **7a**

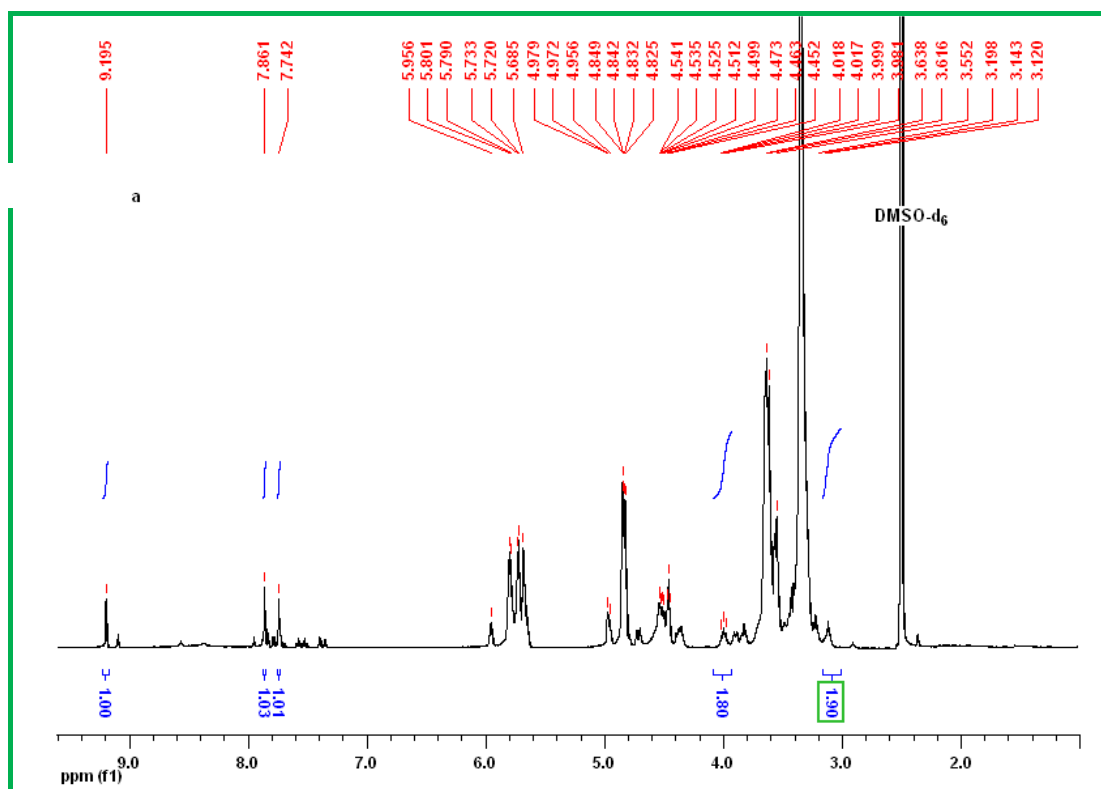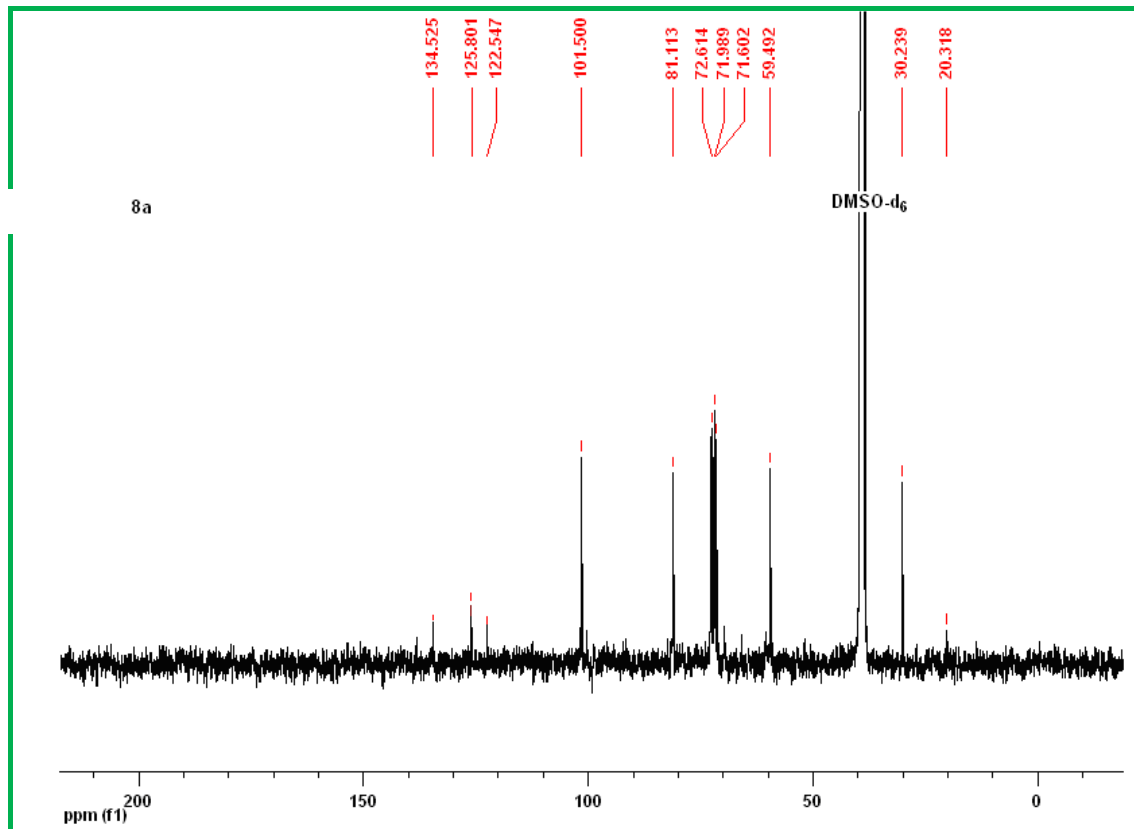

12. Mono-6<sup>A</sup>-[3-(3-ammoniopropyl)-imidazol-1-ium]-6<sup>A</sup>-deoxy-β-cyclodextrin chloride,  
7b

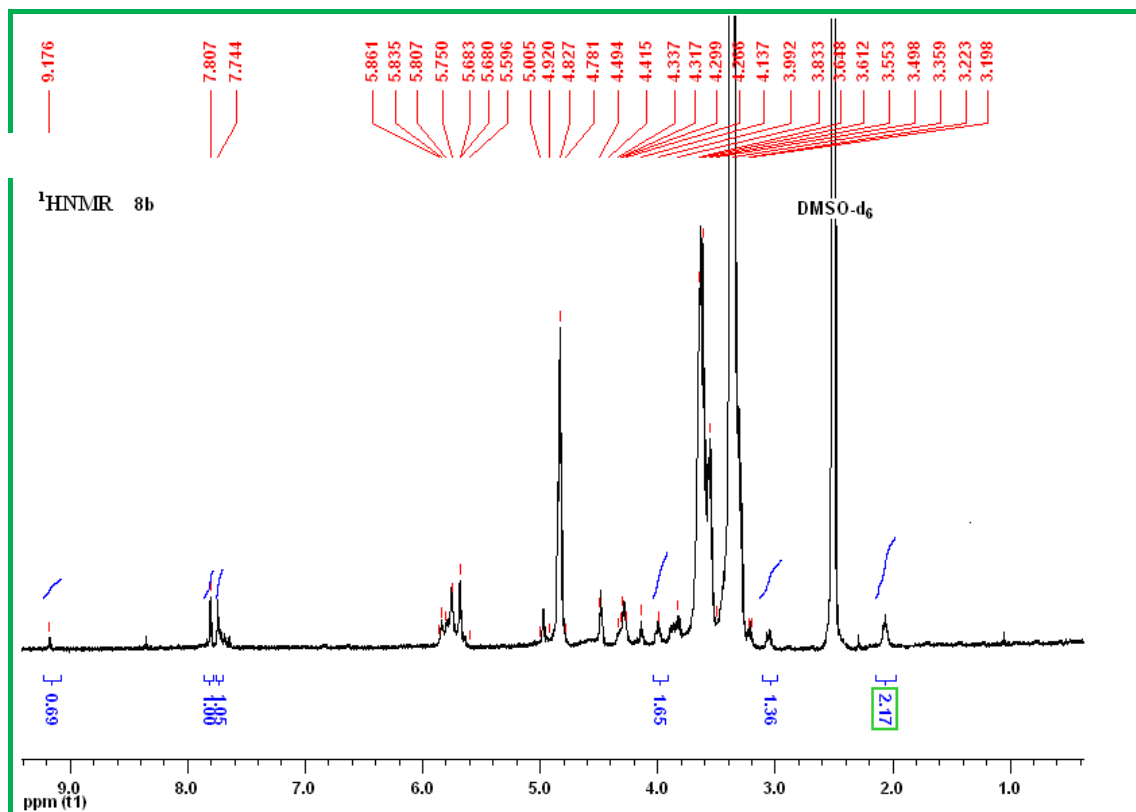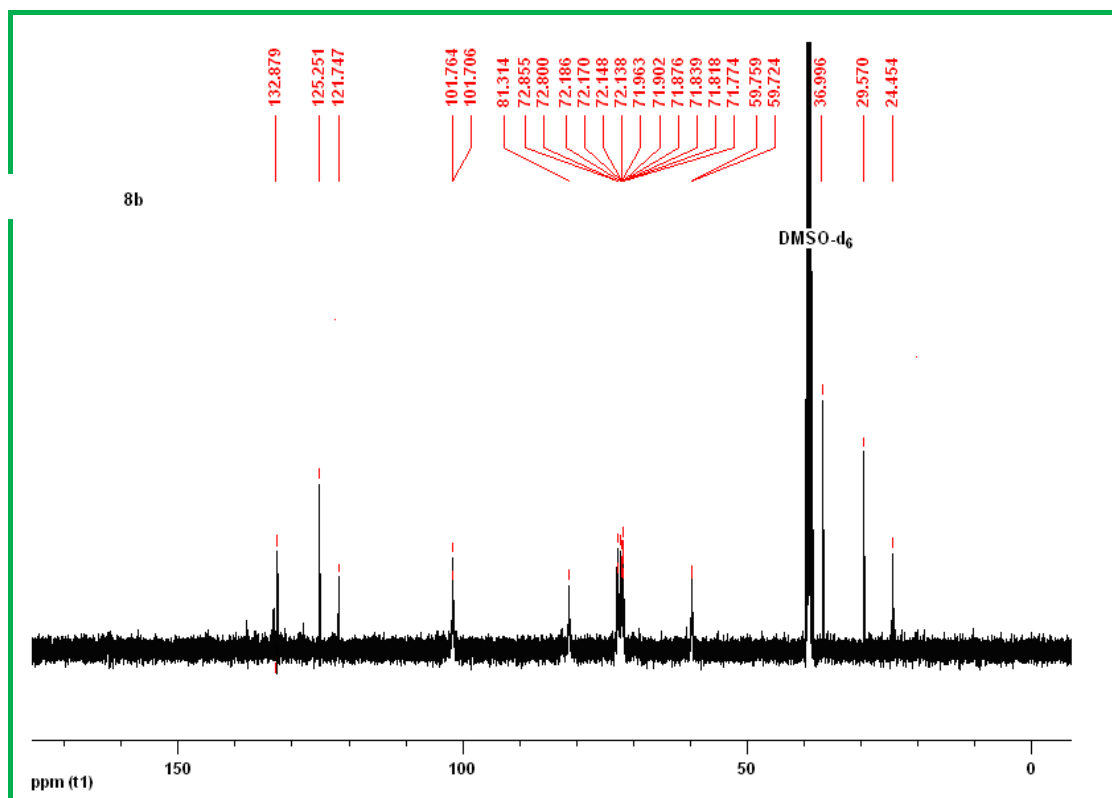

13. Mono-6<sup>A</sup>-[3-(4-ammonibutyl)-imidazol-1-ium]-6<sup>A</sup>-deoxy-β-cyclodextrin chloride, **7c**

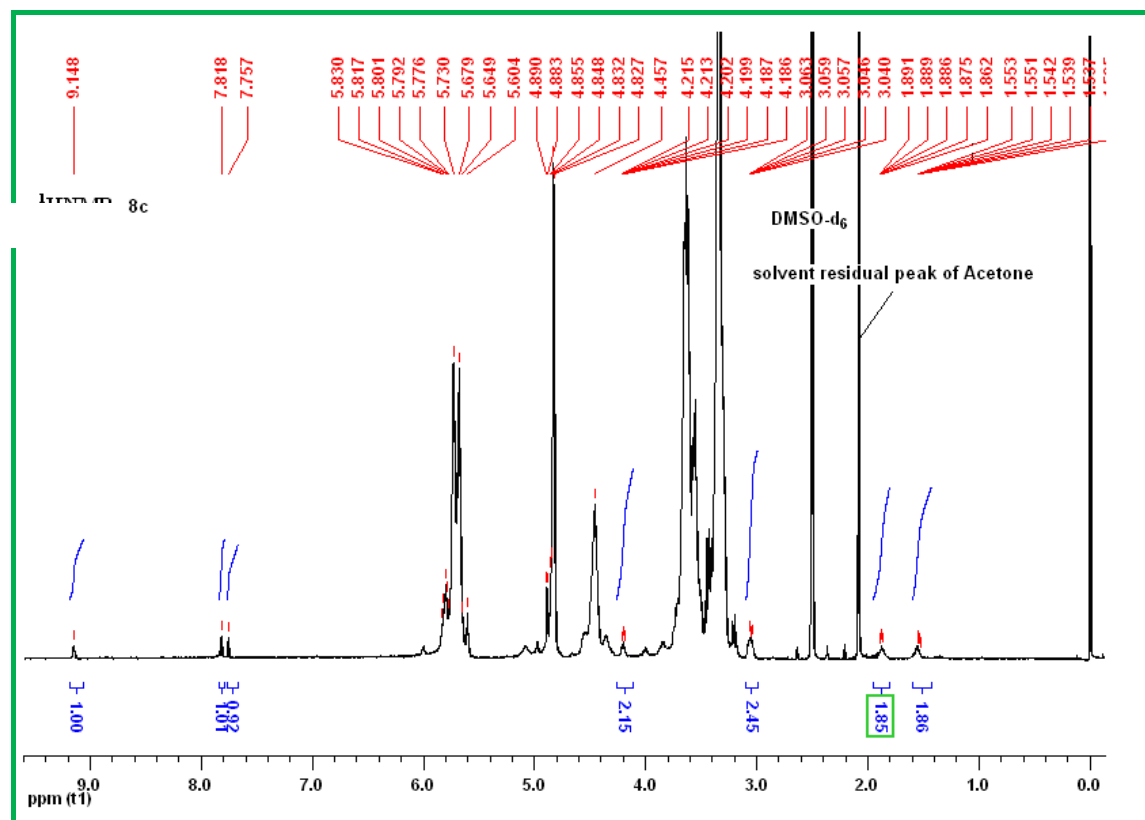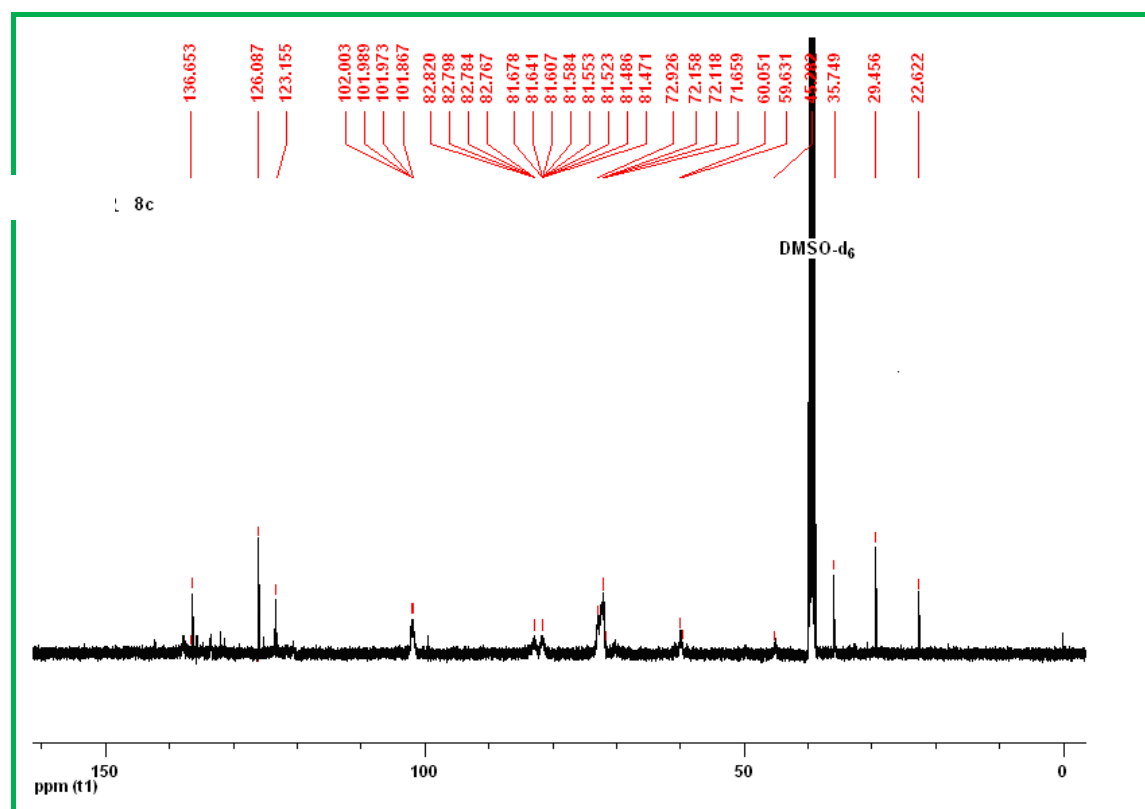

14. Mono-6<sup>A</sup>-[3-(6-ammoniohexyl)-imidazol-1-ium]-6<sup>A</sup>-deoxy-β-cyclodextrin  
chloride, **7d**

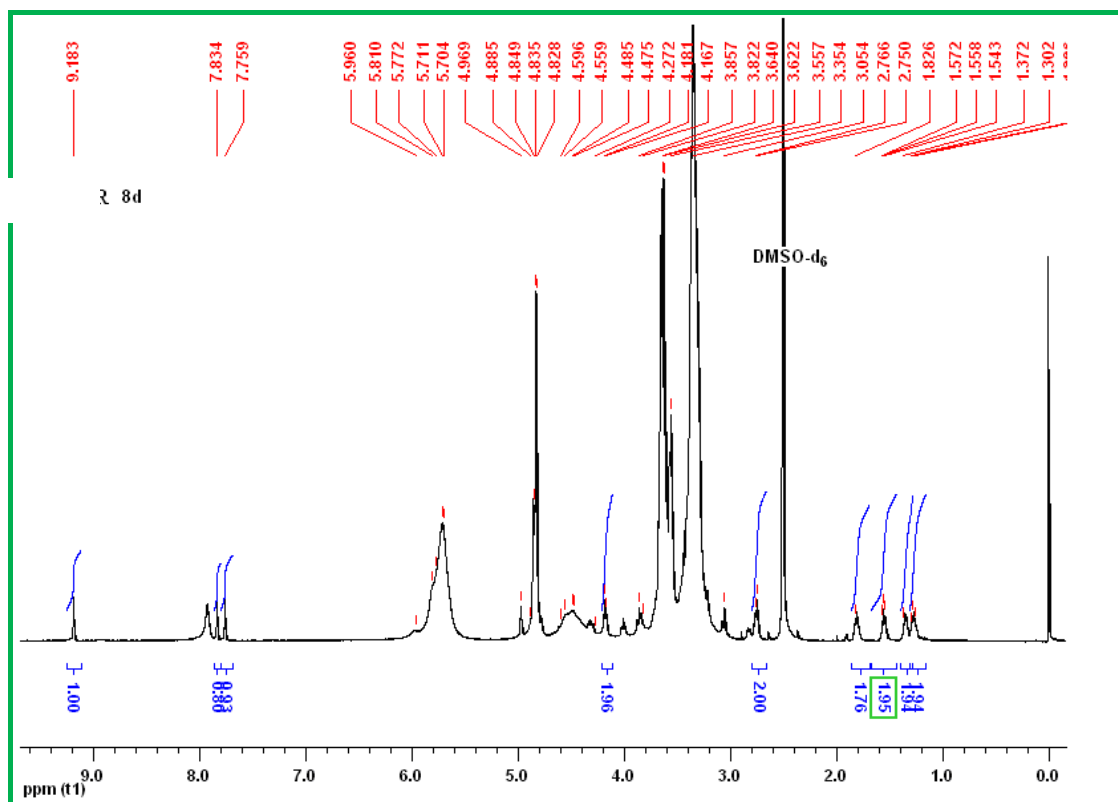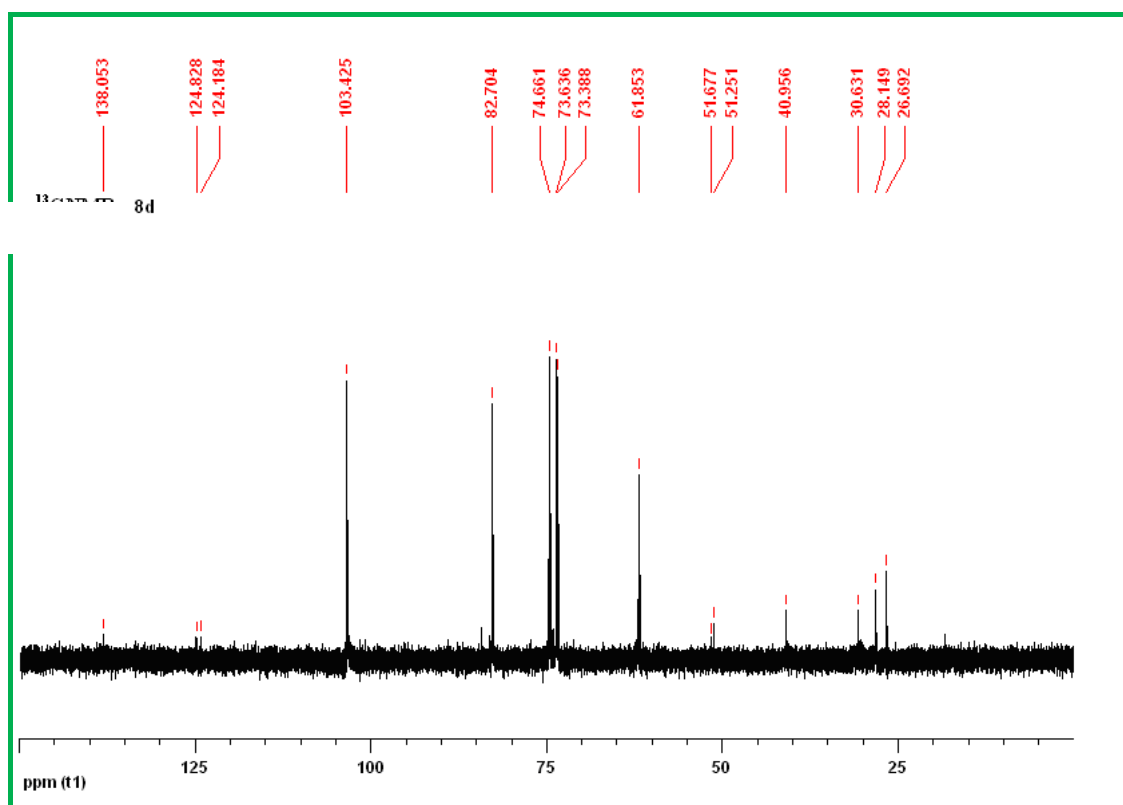



## 15. ESI-MS spectra

Mono-6<sup>A</sup>-[3-(2-(1,3-dioxoisindolin-2-yl)ethyl)-imidazol-1-ium]-6<sup>A</sup>-deoxy-β-cyclodextrin tosylate, **5a**

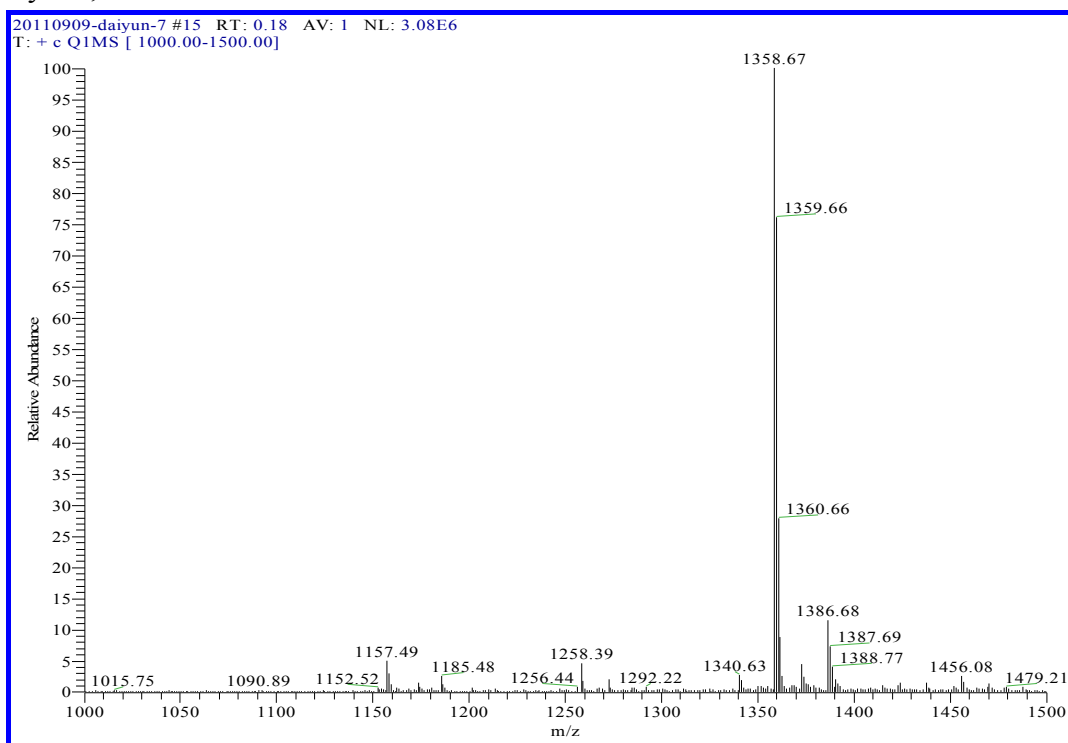

Mono-6<sup>A</sup>-[3-(3-(1,3-dioxoisindolin-2-yl)propyl)-imidazol-1-ium]-6<sup>A</sup>-deoxy-β-cyclodextrin tosylate, **5b**

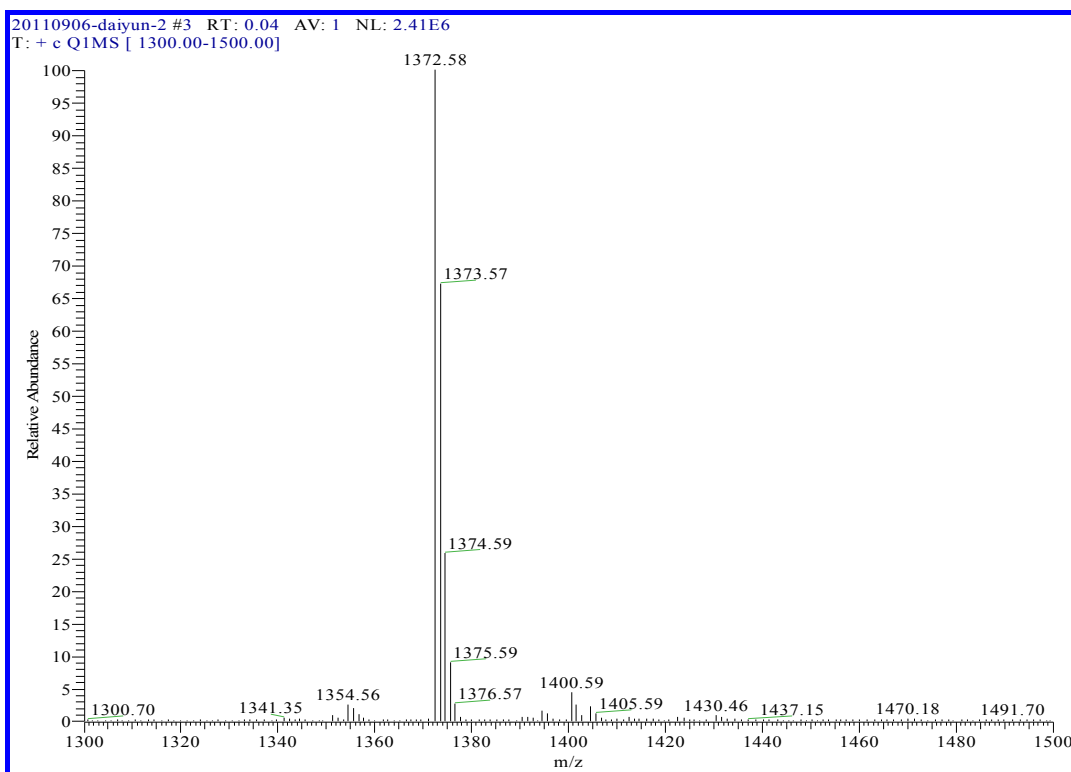

Mono-6<sup>A</sup>-[3-(4-(1,3-dioxisoindolin-2-yl)butyl)-imidazol-1-ium]-6<sup>A</sup>-deoxy-β-cyclodextrin tosylate, **5c**

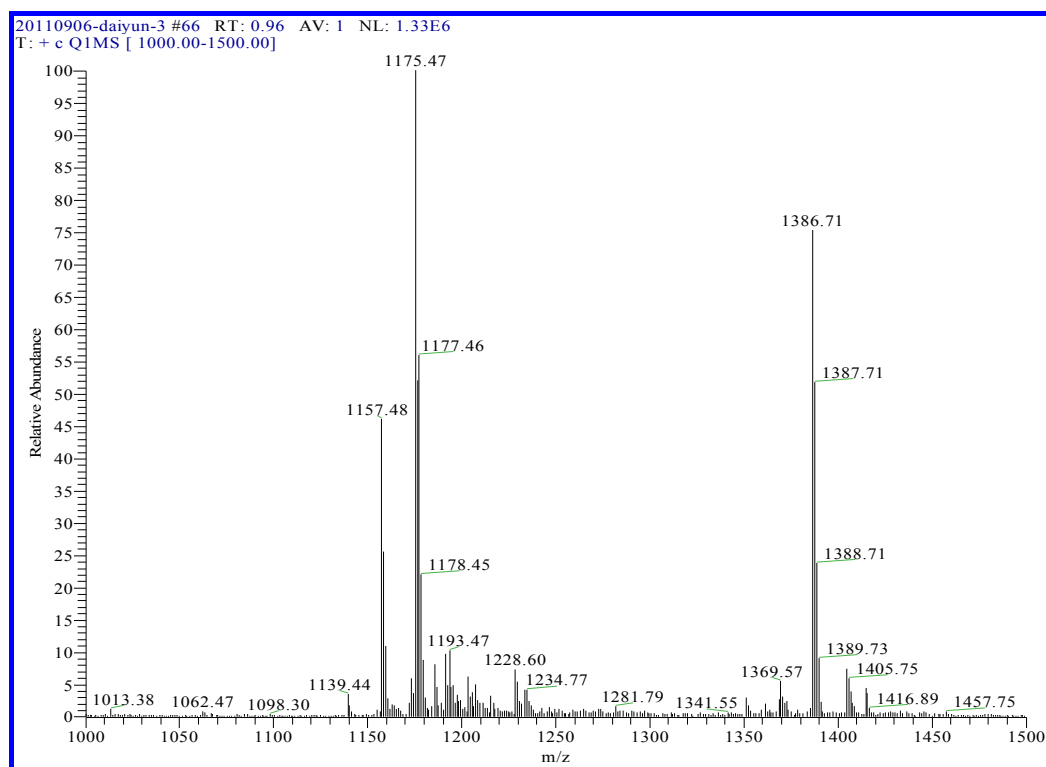

Mono-6<sup>A</sup>-[3-(6-(1,3-dioxisoindolin-2-yl)hexyl)-imidazol-1-ium]-6<sup>A</sup>-deoxy-β-cyclodextrin tosylate, **5d**

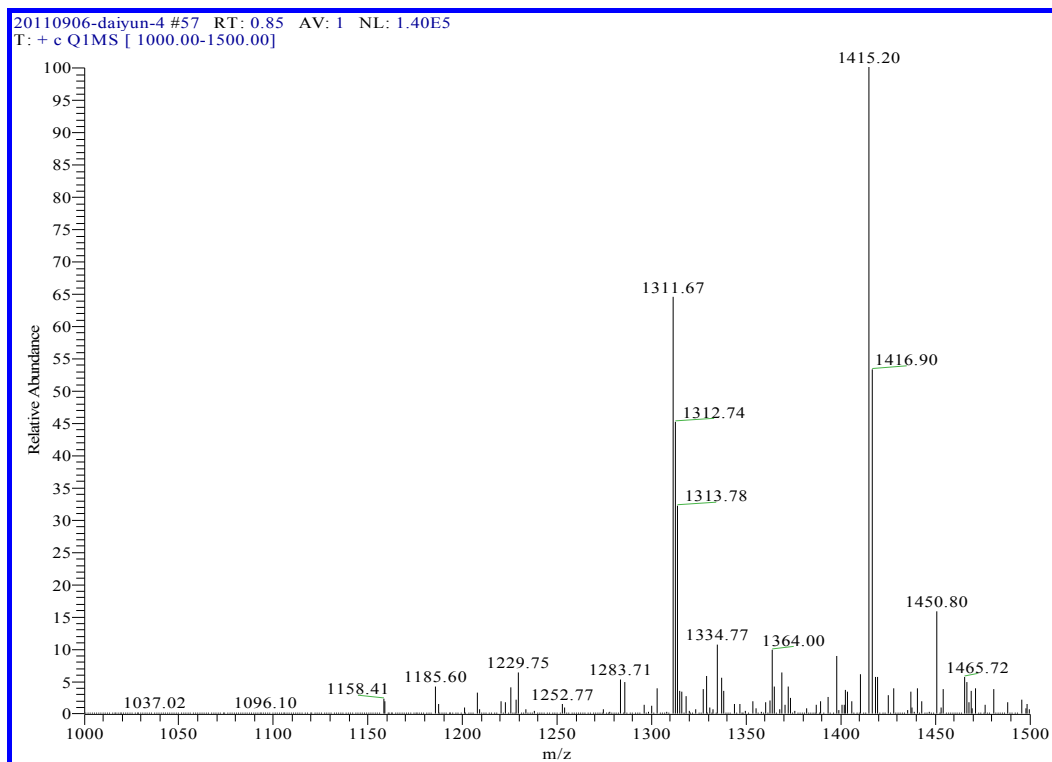

Mono-6<sup>A</sup>-[3-(2-aminoethyl)-imidazol-1-ium]-6<sup>A</sup>-deoxy-β-cyclodextrin tosylate, **6a**

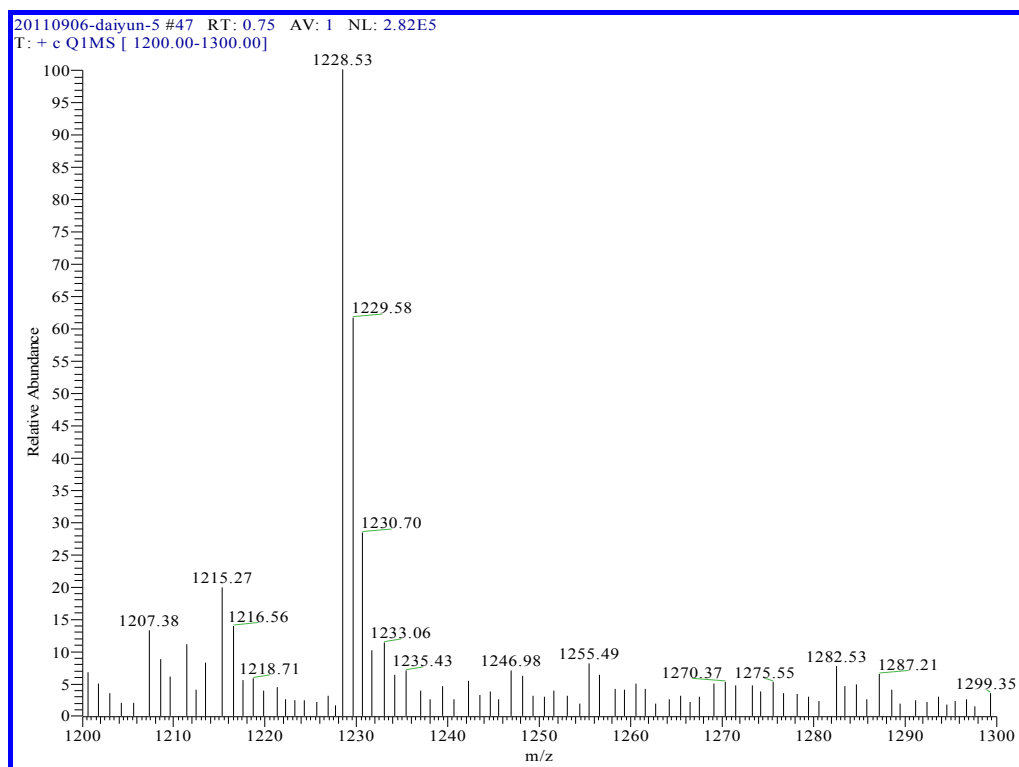

Mono-6<sup>A</sup>-[3-(3-aminopropyl)-imidazolium]-6<sup>A</sup>-deoxy-β-cyclodextrin tosylate, **6b**

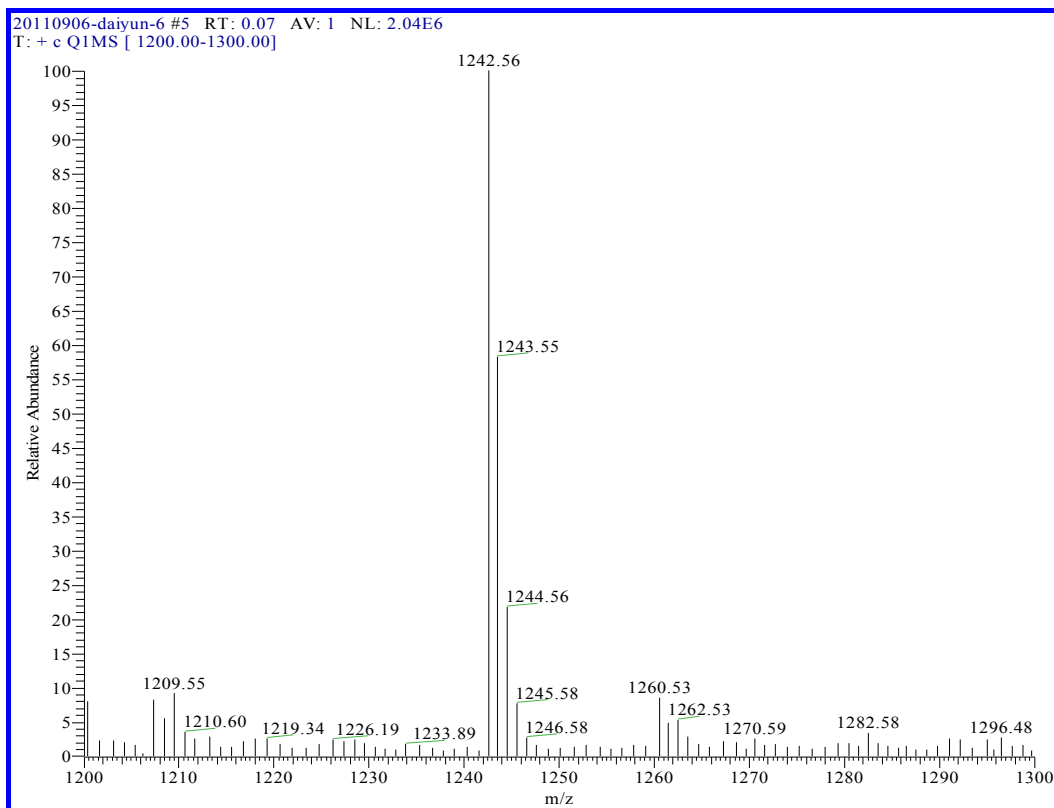

Mono-6<sup>A</sup>-[3-(4-aminobutyl)-imidazol-1-ium]-6<sup>A</sup>-deoxy-β-cyclodextrin tosylate, **6c**

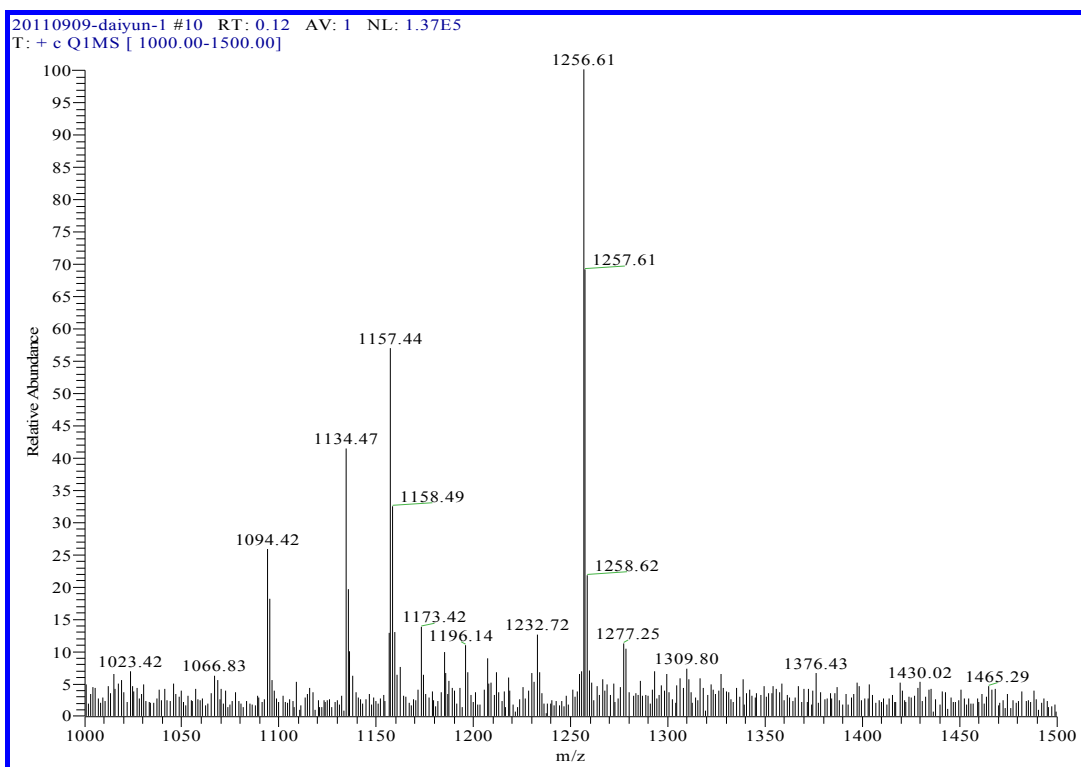

Mono-6<sup>A</sup>-[3-(6-aminohexyl)-imidazol-1-ium]-6<sup>A</sup>-deoxy-β-cyclodextrin tosylate, **6d**

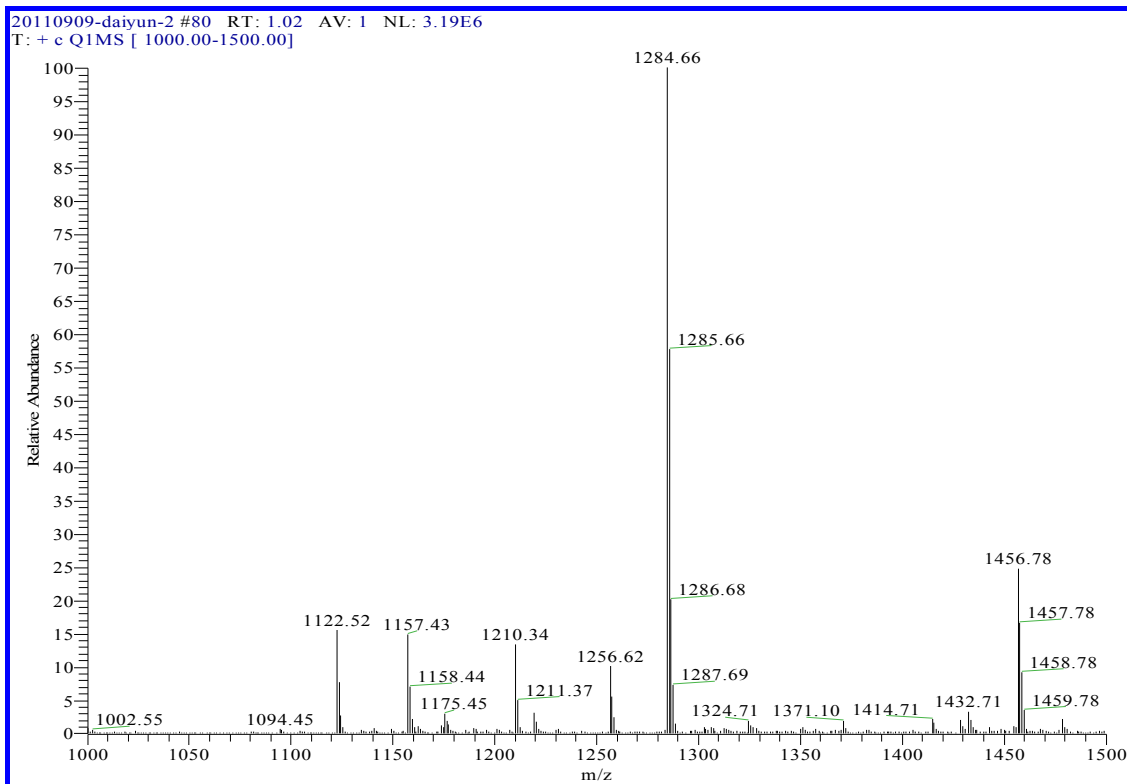

Mono-6<sup>A</sup>-[3-(2-ammonioethyl)-imidazol-1-ium]-6<sup>A</sup>-deoxy-β-cyclodextrin chloride, **7a**

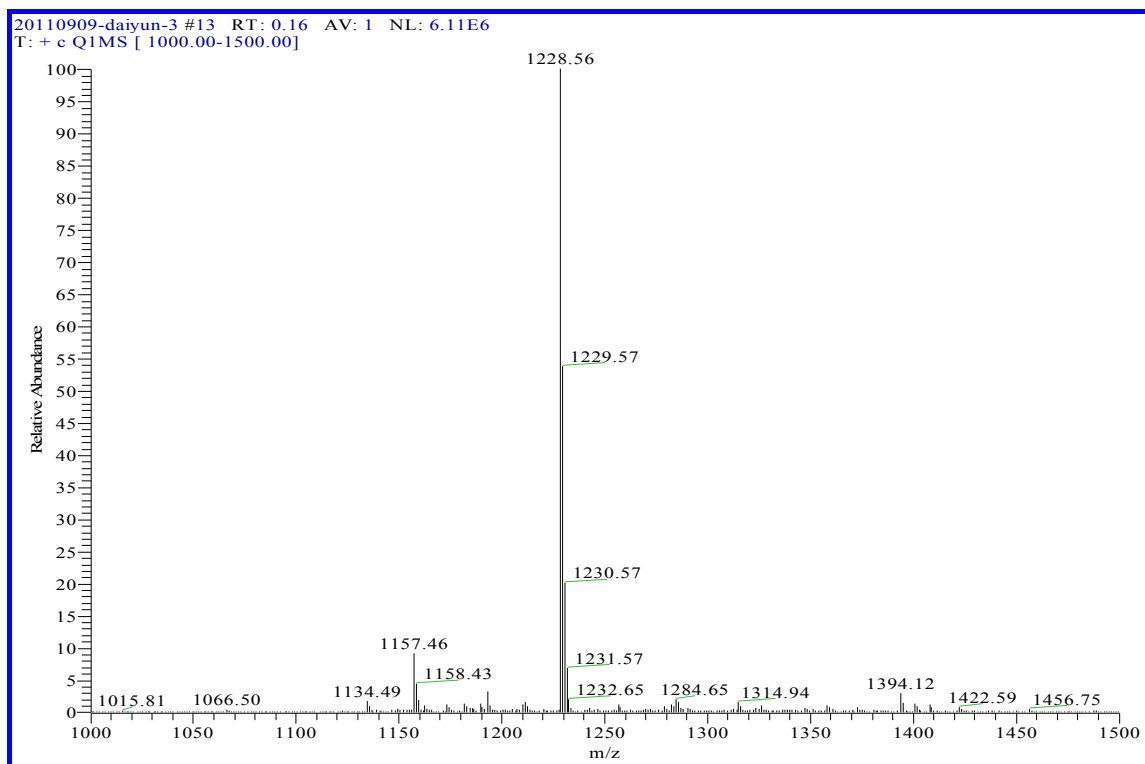

Mono-6<sup>A</sup>-[3-(3-ammoniopropyl)-imidazol-1-ium]-6<sup>A</sup>-deoxy-β-cyclodextrin chloride, **7b**

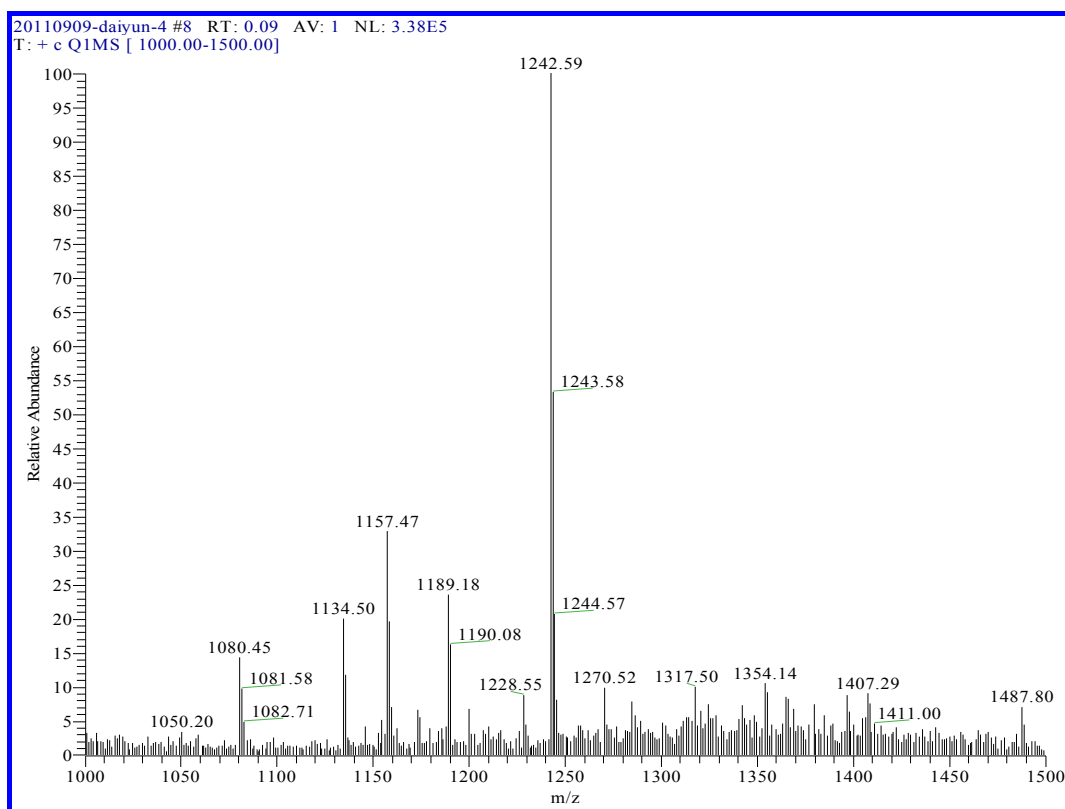

Mono-6<sup>A</sup>-[3-(4-ammoniobutyl)-imidazol-1-ium]-6<sup>A</sup>-deoxy-β-cyclodextrin chloride, **7c**

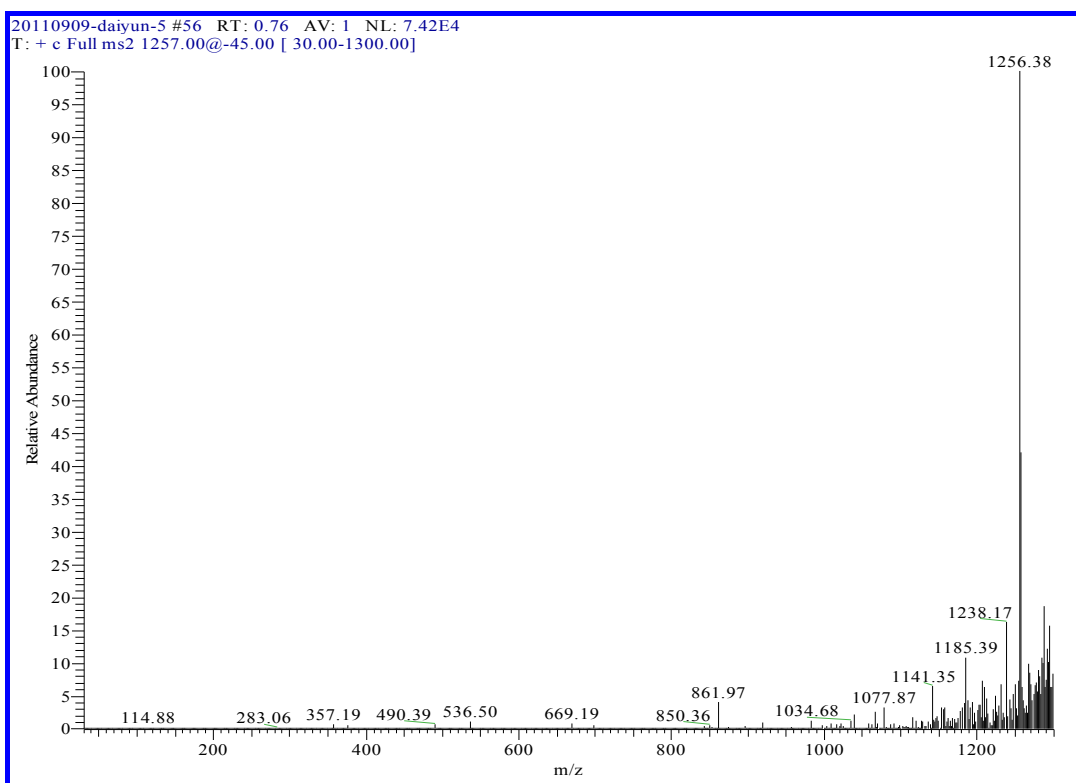

Mono-6<sup>A</sup>-[3-(6-ammoniohexyl)-imidazol-1-ium]-6<sup>A</sup>-deoxy-β-cyclodextrin chloride, **7d**

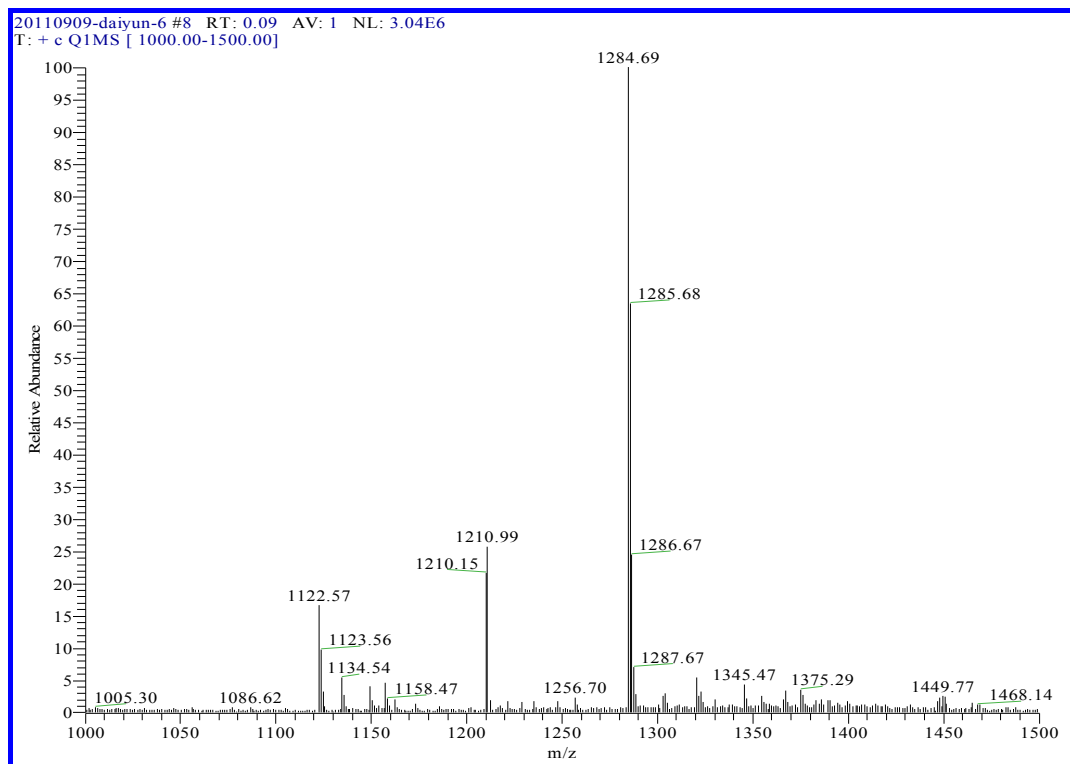

Supplement: c2ra20086d.pdf [file c2ra20086d.pdf]
